# Supplementary material for: Land Use Change in a Pericolonial Society: Intensification and Diversification in Ifugao, Philippines Between 1570 and 1800 CE
Source: Frontiers journal article supplement (doi:10.3389/feart.2022.680926), 2022-03-24
Supplement: Data_Sheet_2.xlsx [file Data_Sheet_2.xlsx]

## Sheet: Template 1800
Ifugao Circle Diagram
Timepoint:	1800
Type:	Template
	SUMMARY OF LAND USE
	Item Number	Category	Area (ha)	Tier
	1	Settlement	5.55	1
	2	Terracing (Payo)	112.317	2
	3	Active Swidden Fields (Uma)	120.108	3
	4	Fallow Swidden Fields (Uma)	240.217	4
	5	Pastureland	92.9401	4
	6	Agroforestry (Muyong)	6.04178	5
	7	Woodlot (Fuel) (Muyong)	85.2	5
	8	Forest Browse (Pigs)	60.6757	6
	9	Total Hunting Land	1390	6
	10	SUM TOTAL INTENSIVE LAND	723.05	N/A
	11	ALL LAND	2113.05	N/A
DIETARY & POPULATION PARAMETERS
Productivity and Calorimetry of Ifugao Foods											Human Parameters						ANIMAL PARAMETERS									Waste Totals
		Crop/Animal	Productivity (kg/ha)	Energy (Cal/kg)	Energy Yield (Cal/ha)	Proportion of Full Diet	Notes					human kcal per day	2234	From Kay and Kaplan 2015				domestic pig weight (kg)	45			ratio of meat per cow from herd : cow weight	0.0736	kay and kaplan 2015, derived from Gregg 1988				kg/yr	Kcal/yr			Pigs in Village:	391.238
	Crops	Wet Rice	1650	3540	5841000	0.32						human kcal per year	815410					Carabao Weight (kg)	436	M&F Ave		ratio of meat per pig from herd: pig weight	0.222	Gregg 1988, p. 122: 40 kg usable meat (which is 30% of live weight) per year / litter size of 6 per year / neolithic pig weight of 30 kg.			Rice Waste	594642	2.85428e+08			Calories per pig per year	579475
		Sweet Potato	6000	1320	7920000	0.21												Goat Weight (kg)	35			ratio of meat per goat from herd: goat weight	0.113	kay and kaplan 2015, derived from Gregg 1988			Yam Waste	266191	1.27772e+08			Calories for all pigs per year	2.26712e+08
		Taro	2000	1110	2220000	0.022																					Taro Waste	56326.1	1.35746e+07
		Purple Yam	5000	950	4750000	0.21																					Deer Waste	25691.9	2.28658e+07
		Banana	5070	1080	5475600	0.025					OKV Settlement Data									productivity	caloric content	energy per area					Fish Waste	7440.21	3.5713e+06			Is Calories from waste greater than calories for pigs?	YES
		Arrowroot	N/A	N/A	N/A	0						Parameter	Value	Source						(kg/ha)	(kcal/kg)	(kcal/ha)	NOTES				Human Waste	207320	184514800			Proportion of Pig Diet made from Waste:	2.81293
		Breadfruit	N/A	N/A	N/A	0						Population	1136					Feeds	pasture grasses	700	1452	1016400	Kay and Kaplan 2015				Total	1.15761e+06	6.37726e+08			If Deer and Fish Excluded?	2.69632
		Squashes	12000	410	4920000	0.015						Households	284	Molano (Scott 1974)					pasture legumes	700	2151	1505700	Kay and Kaplan 2015									If Deer, Fish, and Taro Excluded?	2.63644
		Garden Foods (Settlement/Bunding)	N/A	N/A	N/A	0.035						People per Household	4						forest browse			373646	Kay and Kaplan 2015									If Deer, Fish, Taro, and Rice Excluded?	1.37746
	Domestic Animals	Domestic Pig	N/A	2370	N/A	0.01	Ritual sacrifice,					Estimated Area of Settlement (ha)	5.55	See Section 3.3.1					straw	3408	1122	3823776	Kay and Kaplan 2015									NOTE: SWEET POTATOES NOT INCLUDED
		Chicken	N/A	1730	N/A	0.01	Ritual sacrifice,					Hectares/person in village	0.00488556						Human Excrement	n/a	890	n/a	Gregg 1988
		Dog	N/A	1201	N/A	0.005
		Water Buffalo (Carabao)	N/A	1340	N/A	0.001	Ritual animal,					Sub-Population Name	All People
		Goat	N/A	1480	N/A	0						Sub-Population Number of People	1136
		Chicken Eggs	N/A	1600	N/A	0.014																				Plant Waste ME (kcal/kg)	480	CINE, Morong Aetas, Sweet Potato Leaves
	Wild Animals	Wild Pig	N/A	2370	N/A	0.015																				Taro Boiled Leaves (kcal/kg)	241	USDA
		Wild Deer	N/A	890	N/A	0.016					Fuel						FALLOW PERIODS
		Small Terrestrial Game (Reptiles, Birds)	N/A	1201	N/A	0.032	Assume all shellfish and mudfish identical					average wood productivity in agroforestry (t/ha)	12.9	All cited in Kay and Kaplan 2015				Fallow Years	Active Years
		Fish and Shellfish	N/A	830	N/A	0.06						average wood productivity in agroforestry (kg/m2)	1.29				Terrace Fields:	0 years	All years
					Starch %:	0.762						wood caloric value (MJ/kg)	20				Swidden Fields:	6 years	3 years
CROPS											DOMESTIC ANIMALS						WOODLOT (FUEL)		Total Fuel:	85.2		HUNTING				WASTE FOR SETTLEMENT
	Wet Rice		Total Area:	97.0178							PIGS						Fuel wood for cooking						Density of CAR (people/100 km2)	514.879	1903 Census
		kcal from crop per person per yr	260931		Surplus Fraction	0.3						kcal per person per year from pig meat	8154.1										density (people/ha)	0.0514879			Wet Rice
		save for planting next year (fraction)	0.02	Bray	Area for Surplus	22.3887						kg meat needed per person per year	3.44055					Thai per capita energy comsumption (GJ/capita/yr)	8	System cited from:			ha/person	19.422				NPP (g C ha-1 yr-1)	6500000
		waste and loss (fraction)	0.3									Pigs per person	0.344399					Thai per capita energy comsumption (MJ/capita/yr)	8000	Kay and Kaplan 2015			fraction of diet from wild game	0.063				above ground fraction	0.796	Kay and Kaplan 2015
		kcal/ha net	3.97188e+06									kcal for pig per year per person	199571					Thai per capita wood consumption (kg/capita/yr)	400				hunting area (ha)	1390				weed fraction	0.1	Gregg 1988
		area of crop needed per person (ha)	0.0656946									Waste Fraction of Pig Diet	0.9	1				India per capita fuel wood consumption (kg/capita/yr)	551									Above ground biomass (g C ha^-1 yr-1)	10348000	1/.45 converts C to dry matter
		area of crop needed per village (ha)	74.6291									Forage Fraction of Pig Diet	0.1					per capita fuel wood consumption (GJ/capita/yr)	11.02									Harvest Index	0.23
																		average between India and Thai (kg wood/capita/yr)	475.5									Waste per person (g dry matter/yr)	523452
												Area of forest necessary per person (ha)	0.0534117					kg wood necessary for the whole village	540168									Waste for Village (g dry matter/yr)	5.94642e+08
	Swidden		Combined area------->	120.108								total area for pig per person (ha)	0.0534117					m2 of forest for wood production	418735
		Yam (iuktu)										total area for pigs per village (ha)	60.6757					ha of forest for wood production	41.8735								Yams
		kcal from crop per person per yr	171236		Surplus Fraction:							total pigs per village	391.238															NPP (g C m-2 yr-1)	6500000
		save for planting next year (fraction)	0.1		Yam (ubi)	0.1						Total Caloric Need for all Pigs in Settlement	2.26712e+08															above ground fraction	0.6	Default for Root crops (Taro and Yam)
		waste and loss (fraction)	0.3		Taro (gabe)	0											Ceramics											weed fraction	0.1
		kcal/ha net	2850000		Squash (kalabasa)	0												vessels per household per year	30	Kay and Kaplan 2015								Above ground biomass (g C m^-2 yr-1)	7800000
		area of crop needed per person (ha)	0.0600828		Sweet Potato (Camote)	0.1												average weight of a vessel (kg)	1.5	Estimate								Harvest Index	0.5	Default, mid-estimate for harvest yield of grains and intensely cultivated plants (0.4-0.6)
		area of crop needed per village (ha)	68.2541		Area for Surplus	6.82541					CARABAO							weight of ceramics p.p. (kg yr-1)	45									Waste per person (gC/yr)	234323
												kcal per person per year from carabao meat	815.41					charcoal : ceramics ratio	2	Kay and Kaplan 2015								Waste for Village (gC/yr)	2.66191e+08
		Taro (aba)										kg meat needed per person per year	0.608515					charcoal : wood ratio	4
		kcal from crop per person per yr	17939		Proportion of taro in terraces	1						carabao per person	0.018963					wood needed p. p. for ceramics per year (kg)	360								Taro
		save for planting next year (fraction)	0.1									kcal for carabao per year per person	124576					wood needed p. p. for ceramics per year (GJ)	7.2									NPP (g C m-2 yr-1)	6500000			Raw leaves are poisonous. Cooked, they are consumable
		waste and loss (fraction)	0.3		Terrace taro (ha)	15.2993						pasture grasses fraction of carabao diet	0.6	1	Ratios from Kay and Kaplan 2015			wood for village from ceramics (kg)	408960									above ground fraction	0.59	Hartemink et al 2000
		kcal/ha net	1332000									pasture legumes fraction of carabao diet	0.1					area for woodlot for ceramics (ha)	0	Grasses, twigs only. Maher 1984								weed fraction	0.1
		area of crop needed per person (ha)	0.0134677									straw fraction of carabao diet	0.3															Above ground biomass (g C m^-2 yr-1)	7670000
		area of crop needed per village (ha)	15.2993									area of pasture grasses necessary per person (ha)	0.0735398					All constants cited in Kay and Kaplan 2015										Harvest Index	0.52	Russell and Brown 1998, Hartemink et al 2000
												area of pasture legumes necessary per person (ha)	0.00827366															Waste per person (gC/yr)	49582.8
		Squash (Kalabasa)			Proportion of Squash on Terrace Bunding	1						total area for carabao per person (ha)	0.0818135															Waste for Village (gC/yr)	5.63261e+07
		kcal from crop per person per yr	12231.1									total area for carabao per village (ha)	92.9401				Iron Working
		save for planting next year (fraction)	0									total carabao per village	21.542					Iron per capita per year (kg)	1.5	Kay and Kaplan 2015							Deer Meat
		waste and loss (fraction)	0.3		Terrace Squash (ha)	4.03443												charcoal : iron ratio	82	Sauder and Williams 2002								Fraction of Deer that is Meat	26.7421		Note, Deer waste is a high estimate.
		kcal/ha net	3444000									ALL ANIMALS DISTRIBUTED DURING FEASTS, USE FULL POPULATION!						charcoal : wood ratio	4									Weight of Deer (kg)	68		Includes head, skin, innards, legs. These parts may not have returned to the village.
		area of crop needed per person (ha)	0.00355144															wood needed p. p. for iron (kg yr-1)	492									Waste per Deer (kg)	41.2579		Field dressing would have removed several portions
		area of crop needed per village (ha)	4.03443								GOATS							wood needed p. p. for iron (GJ yr-1)	9.84									Calories per Deer for Humans	23800.5
												kcal per person per year from goat meat	0					wood for village from ironworking (kg)	558912									Calories per Deer for Waste	36719.5
		Sweet Potato (gattuk)										kg meat needed per person per year	0					area for woodlot for iron (ha)	43.3265									Calories from deer per person per year	13046.6
		kcal from crop per person per yr	171236		Area for Surplus	4.09352						goat per person	0															Deer consumed per person per year	0.548164
		save for planting next year (fraction)	0.1									kcal for goat per year per person	0					All constants cited in Kay and Kaplan 2015										Deer consumed for village per year	622.714
		waste and loss (fraction)	0.3									pasture grasses fraction of goat diet	0.65	1														Deer Waste Generated in village per year (kg)	25691.9
		kcal/ha net	4752000									pasture legumes fraction of goat diet	0.1															Deer Waste Generated in village per year (kcal)	2.28658e+07
		area of crop needed per person (ha)	0.0360345									forest browse fraction of goat diet	0.25				MUYONG PRIVATELY OWNED, COMMUNALLY USED FOR FUEL. TOTAL POP. NEEDS DETERMINE TOTAL MUYONG AREA										Mudfish Meat
		area of crop needed per village (ha)	40.9352									area of pasture grasses necessary per person (ha)	0															Fraction of Fish that is Meat	0.9	Aggregate of adult fish and fry (which are consumed whole)
												area of pasture legumes necessary per person (ha)	0															Weight of Fish (kg)	0.2	agriculture.com.ph
												area of forest necessary per person (ha)	0															Waste per Mudfish (kg)	0.02
												total area for goat per person (ha)	0															Calories per Fish for Humans	149.4
	Agroforestry		Combined Area	6.04178								total area for goat per village (ha)	0															Calories from fish per person per year	48924.6
	Banana											total goat per village	0															Fish consumed per person per year	327.474
		kcal from crop per person per yr	20385.2																									Fish consumed by village per year	372010	Fish from Payo plus river.
		save for planting next year (fraction)	0																									Fish Waste Generated in village per year (kg)	7440.21
		waste and loss (fraction)	0.3																									Caloric Value of Fish Waste Generated in village each year	8.93569e+06
		kcal/ha net	3.83292e+06
		area of crop needed per person (ha)	0.00531846																								Human Excrement
		area of crop needed per village (ha)	6.04178																									human excrement per day per person (kg)	0.5	Gregg 1988
																												human excrement (kg excrement yr-1)	182.5
																												kcal per kg of human excrement	890
																												kcal from human excrement per person yr-1	162425
																												Human excrement for settlement (kg/yr)	207320
																												kcal from human excrement for whole village per year	184514800

## Sheet: Template 1570
Ifugao Circle Diagram
Timepoint:	1570
Type:	Template
	SUMMARY OF LAND USE
	Item Number	Category	Area (ha)	Tier
	1	Settlement	2.74	1
	2	Terracing (Payo)	13.3522	2
	3	Active Swidden Fields (Uma)	177.107	3
	4	Fallow Swidden Fields (Uma)	354.214	4
	5	Pastureland	0	4
	6	Agroforestry (Muyong)	3.02089	5
	7	Woodlot (Fuel) (Muyong)	42.6	5
	8	Forest Browse (Pigs)	30.3378	6
	9	Total Hunting Land	1390	6
	10	SUM TOTAL INTENSIVE LAND	623.371	N/A
	11	ALL LAND	2013.37	N/A
DIETARY & POPULATION PARAMETERS
Productivity and Calorimetry of Ifugao Foods											Human Parameters						ANIMAL PARAMETERS									Waste Totals
		Crop/Animal	Productivity (kg/ha)	Energy (Cal/kg)	Energy Yield (Cal/ha)	Proportion of Full Diet	Notes					human kcal per day	2234	From Kay and Kaplan 2015				domestic pig weight (kg)	45			ratio of meat per cow from herd : cow weight	0.0736	kay and kaplan 2015, derived from Gregg 1988				kg/yr	Kcal/yr			Pigs in Village:	195.619
	Crops	Wet Rice	1650	3540	5841000	0	Not yet grown, pericolonialism					human kcal per year	815410					Carabao Weight (kg)	436	M&F Ave		ratio of meat per pig from herd: pig weight	0.222	Gregg 1988, p. 122: 40 kg usable meat (which is 30% of live weight) per year / litter size of 6 per year / neolithic pig weight of 30 kg.			Rice Waste	0	0			Calories per pig per year	579475
		Sweet Potato	6000	1320	7920000	0	Not yet grown, comes from Manila Galleons											Goat Weight (kg)	35			ratio of meat per goat from herd: goat weight	0.113	kay and kaplan 2015, derived from Gregg 1988			Yam Waste	280768	1.34769e+08			Calories for all pigs per year	1.13356e+08
		Taro	2000	1110	2220000	0.32	Primary ritual starch, pericolonialism																				Taro Waste	409644	9.87242e+07
		Purple Yam	5000	950	4750000	0.443																					Deer Waste	12845.9	1.14329e+07
		Banana	5070	1080	5475600	0.025					OKV Settlement Data									productivity	caloric content	energy per area					Fish Waste	3720.1	1.78565e+06			Is Calories from waste greater than calories for pigs?	YES
		Arrowroot	N/A	N/A	N/A	0						Parameter	Value	Source						(kg/ha)	(kcal/kg)	(kcal/ha)	NOTES				Human Waste	103660	92257400			Proportion of Pig Diet made from Waste:	2.9903
		Breadfruit	N/A	N/A	N/A	0						Population	568					Feeds	pasture grasses	700	1452	1016400	Kay and Kaplan 2015				Total	810638	3.38969e+08			If Deer and Fish Excluded?	2.87369
		Squashes	12000	410	4920000	0.015						Households	?						pasture legumes	700	2151	1505700	Kay and Kaplan 2015									If Deer, Fish, and Taro Excluded?	2.00277
		Garden Foods (Settlement/Bunding)	N/A	N/A	N/A	0.035						People per Household	?						forest browse			373646	Kay and Kaplan 2015									If Deer, Fish, Taro, and Rice Excluded?	2.00277
	Domestic Animals	Domestic Pig	N/A	2370	N/A	0.01	Ritual sacrifice,					Estimated Area of Settlement (ha)	2.74	See Section 3.3.1					straw	1704	1122	1911888	Kay and Kaplan 2015
		Chicken	N/A	1730	N/A	0.01	Ritual sacrifice,					Hectares/person in village	0.00482394						Human Excrement	n/a	890	n/a	Gregg 1988
		Dog	N/A	1201	N/A	0.005
		Water Buffalo (Carabao)	N/A	1340	N/A	0	Ritual animal,					Sub-Population Name	All People
		Goat	N/A	1480	N/A	0						Sub-Population Number of People	568
		Chicken Eggs	N/A	1600	N/A	0.014																				Plant Waste ME (kcal/kg)	480	CINE, Morong Aetas, Sweet Potato Leaves
	Wild Animals	Wild Pig	N/A	2370	N/A	0.015																				Taro Boiled Leaves (kcal/kg)	241	USDA
		Wild Deer	N/A	890	N/A	0.016					Fuel						FALLOW PERIODS
		Small Terrestrial Game (Reptiles, Birds)	N/A	1201	N/A	0.032	Assume all shellfish and mudfish identical					average wood productivity in agroforestry (t/ha)	12.9	All cited in Kay and Kaplan 2015				Fallow Years	Active Years
		Fish and Shellfish	N/A	830	N/A	0.06						average wood productivity in agroforestry (kg/m2)	1.29				Terrace Fields:	0 years	All years
					Total	1						wood caloric value (MJ/kg)	20				Swidden Fields:	6 years	3 years
CROPS											DOMESTIC ANIMALS						WOODLOT (FUEL)		Total Fuel:	42.6		HUNTING				WASTE FOR SETTLEMENT
	Wet Rice		Total Area:	0							PIGS						Fuel wood for cooking						Density of CAR (people/100 km2)	257.44	Binford
		kcal from crop per person per yr	0		Surplus Fraction	0.3						kcal per person per year from pig meat	8154.1										density (people/ha)	0.025744			Wet Rice
		save for planting next year (fraction)	0.02	Bray	Area for Surplus	0						kg meat needed per person per year	3.44055					Thai per capita energy comsumption (GJ/capita/yr)	8	System cited from:			ha/person	38.8441				NPP (g C ha-1 yr-1)	6500000
		waste and loss (fraction)	0.3									Pigs per person	0.344399					Thai per capita energy comsumption (MJ/capita/yr)	8000	Kay and Kaplan 2015			fraction of diet from wild game	0.063				above ground fraction	0.796	Kay and Kaplan 2015
		kcal/ha net	3.97188e+06									kcal for pig per year per person	199571					Thai per capita wood consumption (kg/capita/yr)	400				hunting area (ha)	1390				weed fraction	0.1	Gregg 1988
		area of crop needed per person (ha)	0									Waste Fraction of Pig Diet	0.9	1				India per capita fuel wood consumption (kg/capita/yr)	551									Above ground biomass (g C ha^-1 yr-1)	10348000	1/.45 converts C to dry matter
		area of crop needed per village (ha)	0									Forage Fraction of Pig Diet	0.1					per capita fuel wood consumption (GJ/capita/yr)	11.02									Harvest Index	0.23
																		average between India and Thai (kg wood/capita/yr)	475.5									Waste per person (g dry matter/yr)	0
												Area of forest necessary per person (ha)	0.0534117					kg wood necessary for the whole village	270084									Waste for Village (g dry matter/yr)	0
	Swidden		Combined area------->	177.107								total area for pig per person (ha)	0.0534117					m2 of forest for wood production	209367
		Yam (iuktu)										total area for pigs per village (ha)	30.3378					ha of forest for wood production	20.9367								Yams
		kcal from crop per person per yr	361227		Surplus Fraction:							total pigs per village	195.619															NPP (g C m-2 yr-1)	6500000
		save for planting next year (fraction)	0.1		Yam (ubi)	0.1						Total Caloric Need for all Pigs in Settlement	1.13356e+08															above ground fraction	0.6	Default for Root crops (Taro and Yam)
		waste and loss (fraction)	0.3		Taro (gabe)	0											Ceramics											weed fraction	0.1
		kcal/ha net	2850000		Squash (kalabasa)	0												vessels per household per year	30	Kay and Kaplan 2015								Above ground biomass (g C m^-2 yr-1)	7800000
		area of crop needed per person (ha)	0.126746		Sweet Potato (Camote)	0.1												average weight of a vessel (kg)	1.5	Estimate								Harvest Index	0.5	Default, mid-estimate for harvest yield of grains and intensely cultivated plants (0.4-0.6)
		area of crop needed per village (ha)	71.9918		Area for Surplus	7.19918					CARABAO							weight of ceramics p.p. (kg yr-1)	45									Waste per person (gC/yr)	494310
												kcal per person per year from carabao meat	0					charcoal : ceramics ratio	2	Kay and Kaplan 2015								Waste for Village (gC/yr)	2.80768e+08
		Taro (aba)										kg meat needed per person per year	0					charcoal : wood ratio	4
		kcal from crop per person per yr	260931		Proportion of taro in terraces	0.12						carabao per person	0					wood needed p. p. for ceramics per year (kg)	360								Taro
		save for planting next year (fraction)	0.1									kcal for carabao per year per person	0					wood needed p. p. for ceramics per year (GJ)	7.2									NPP (g C m-2 yr-1)	6500000			Raw leaves are poisonous. Cooked, they are consumable
		waste and loss (fraction)	0.3		Terrace taro (ha)	13.3522						pasture grasses fraction of carabao diet	0.6	1	Ratios from Kay and Kaplan 2015			wood for village from ceramics (kg)	204480									above ground fraction	0.59	Hartemink et al 2000
		kcal/ha net	1332000									pasture legumes fraction of carabao diet	0.1					area for woodlot for ceramics (ha)	0	Grasses, twigs only. Maher 1984								weed fraction	0.1
		area of crop needed per person (ha)	0.195894									straw fraction of carabao diet	0.3															Above ground biomass (g C m^-2 yr-1)	7670000
		area of crop needed per village (ha)	111.268									area of pasture grasses necessary per person (ha)	0					All constants cited in Kay and Kaplan 2015										Harvest Index	0.52	Russell and Brown 1998, Hartemink et al 2000
												area of pasture legumes necessary per person (ha)	0															Waste per person (gC/yr)	721204
		Squash			Proportion of Squash on Terrace Bunding	1						total area for carabao per person (ha)	0															Waste for Village (gC/yr)	4.09644e+08
		kcal from crop per person per yr	12231.1									total area for carabao per village (ha)	0				Iron Working
		save for planting next year (fraction)	0									total carabao per village	0					Iron per capita per year (kg)	1.5	Kay and Kaplan 2015							Deer Meat
		waste and loss (fraction)	0.3		Terrace Squash (ha)	2.01722												charcoal : iron ratio	82	Sauder and Williams 2002								Fraction of Deer that is Meat	26.7421		Note, Deer waste is a high estimate.
		kcal/ha net	3444000									ALL ANIMALS DISTRIBUTED DURING FEASTS, USE FULL POPULATION!						charcoal : wood ratio	4									Weight of Deer (kg)	68		Includes head, skin, innards, legs. These parts may not have returned to the village.
		area of crop needed per person (ha)	0.00355144															wood needed p. p. for iron (kg yr-1)	492									Waste per Deer (kg)	41.2579		Field dressing would have removed several portions
		area of crop needed per village (ha)	2.01722								GOATS							wood needed p. p. for iron (GJ yr-1)	9.84									Calories per Deer for Humans	23800.5
												kcal per person per year from goat meat	0					wood for village from ironworking (kg)	279456									Calories per Deer for Waste	36719.5
		Sweet Potato (gattuk)										kg meat needed per person per year	0					area for woodlot for iron (ha)	21.6633									Calories from deer per person per year	13046.6
		kcal from crop per person per yr	0		Area for Surplus	0						goat per person	0															Deer consumed per person per year	0.548164
		save for planting next year (fraction)	0.1									kcal for goat per year per person	0					All constants cited in Kay and Kaplan 2015										Deer consumed for village per year	311.357
		waste and loss (fraction)	0.3									pasture grasses fraction of goat diet	0.65	1														Deer Waste Generated in village per year (kg)	12845.9
		kcal/ha net	4752000									pasture legumes fraction of goat diet	0.1															Deer Waste Generated in village per year (kcal)	1.14329e+07
		area of crop needed per person (ha)	0									forest browse fraction of goat diet	0.25				MUYONG PRIVATELY OWNED, COMMUNALLY USED FOR FUEL. TOTAL POP. NEEDS DETERMINE TOTAL MUYONG AREA										Mudfish Meat
		area of crop needed per village (ha)	0									area of pasture grasses necessary per person (ha)	0															Fraction of Fish that is Meat	0.9	Aggregate of adult fish and fry (which are consumed whole)
												area of pasture legumes necessary per person (ha)	0															Weight of Fish (kg)	0.2	agriculture.com.ph
												area of forest necessary per person (ha)	0															Waste per Mudfish (kg)	0.02
												total area for goat per person (ha)	0															Calories per Fish for Humans	149.4
	Agroforestry		Combined Area	3.02089								total area for goat per village (ha)	0															Calories from fish per person per year	48924.6
	Banana											total goat per village	0															Fish consumed per person per year	327.474
		kcal from crop per person per yr	20385.2																									Fish consumed by village per year	186005	Fish from Payo plus river.
		save for planting next year (fraction)	0																									Fish Waste Generated in village per year (kg)	3720.1
		waste and loss (fraction)	0.3																									Caloric Value of Fish Waste Generated in village each year	4.46784e+06
		kcal/ha net	3.83292e+06
		area of crop needed per person (ha)	0.00531846																								Human Excrement
		area of crop needed per village (ha)	3.02089																									human excrement per day per person (kg)	0.5	Gregg 1988
																												human excrement (kg excrement yr-1)	182.5
																												kcal per kg of human excrement	890
																												kcal from human excrement per person yr-1	162425
																												Human excrement for settlement (kg/yr)	103660
																												kcal from human excrement for whole village per year	92257400

## Sheet: Low Pop. 1800
Ifugao Circle Diagram
Timepoint:	1800
Type:	Low Population
	SUMMARY OF LAND USE
	Item Number	Category	Area (ha)	Tier
	1	Settlement	5.007	1
	2	Terracing (Payo)	84.2379	2
	3	Active Swidden Fields (Uma)	90.0812	3
	4	Fallow Swidden Fields (Uma)	180.162	4
	5	Pastureland	69.7051	4
	6	Agroforestry (Muyong)	4.53133	5
	7	Woodlot (Fuel) (Muyong)	63.9	5
	8	Forest Browse (Pigs)	45.5068	6
	9	Total Hunting Land	1042.5	6
	10	SUM TOTAL INTENSIVE LAND	543.132	N/A
	11	ALL LAND	1585.63	N/A
DIETARY & POPULATION PARAMETERS
Productivity and Calorimetry of Ifugao Foods											Human Parameters						ANIMAL PARAMETERS									Waste Totals
		Crop/Animal	Productivity (kg/ha)	Energy (Cal/kg)	Energy Yield (Cal/ha)	Proportion of Full Diet	Notes					human kcal per day	2234	From Kay and Kaplan 2015				domestic pig weight (kg)	45			ratio of meat per cow from herd : cow weight	0.0736	kay and kaplan 2015, derived from Gregg 1988				kg/yr	Kcal/yr			Pigs in Village:	293.428
	Crops	Wet Rice	1650	3540	5841000	0.32						human kcal per year	815410					Carabao Weight (kg)	436	M&F Ave		ratio of meat per pig from herd: pig weight	0.222	Gregg 1988, p. 122: 40 kg usable meat (which is 30% of live weight) per year / litter size of 6 per year / neolithic pig weight of 30 kg.			Rice Waste	445981	2.14071e+08			Calories per pig per year	579475
		Sweet Potato	6000	1320	7920000	0.21												Goat Weight (kg)	35			ratio of meat per goat from herd: goat weight	0.113	kay and kaplan 2015, derived from Gregg 1988			Yam Waste	199643	9.58288e+07			Calories for all pigs per year	1.70034e+08
		Taro	2000	1110	2220000	0.022																					Taro Waste	42244.5	1.01809e+07
		Purple Yam	5000	950	4750000	0.21																					Deer Waste	19268.9	1.71493e+07
		Banana	5070	1080	5475600	0.025					OKV Settlement Data									productivity	caloric content	energy per area					Fish Waste	5580.16	2.67847e+06			Is Calories from waste greater than calories for pigs?	YES
		Arrowroot	N/A	N/A	N/A	0						Parameter	Value	Source						(kg/ha)	(kcal/kg)	(kcal/ha)	NOTES				Human Waste	155490	138386100			Proportion of Pig Diet made from Waste:	2.81293
		Breadfruit	N/A	N/A	N/A	0						Population	852					Feeds	pasture grasses	700	1452	1016400	Kay and Kaplan 2015				Total	868208	4.78295e+08			If Deer and Fish Excluded?	2.69632
		Squashes	12000	410	4920000	0.015						Households	284	Molano (Scott 1974)					pasture legumes	700	2151	1505700	Kay and Kaplan 2015									If Deer, Fish, and Taro Excluded?	2.63644
		Garden Foods (Settlement/Bunding)	N/A	N/A	N/A	0.035						People per Household	3						forest browse			373646	Kay and Kaplan 2015									If Deer, Fish, Taro, and Rice Excluded?	1.37746
	Domestic Animals	Domestic Pig	N/A	2370	N/A	0.01	Ritual sacrifice,					Estimated Area of Settlement (ha)	5.007	See Section 3.3.1					straw	2556	1122	2867832	Kay and Kaplan 2015
		Chicken	N/A	1730	N/A	0.01	Ritual sacrifice,					Hectares/person in village	0.00587676						Human Excrement	n/a	890	n/a	Gregg 1988
		Dog	N/A	1201	N/A	0.005
		Water Buffalo (Carabao)	N/A	1340	N/A	0.001	Ritual animal,					Sub-Population Name	All People
		Goat	N/A	1480	N/A	0						Sub-Population Number of People	852
		Chicken Eggs	N/A	1600	N/A	0.014																				Plant Waste ME (kcal/kg)	480	CINE, Morong Aetas, Sweet Potato Leaves
	Wild Animals	Wild Pig	N/A	2370	N/A	0.015																				Taro Boiled Leaves (kcal/kg)	241	USDA
		Wild Deer	N/A	890	N/A	0.016					Fuel						FALLOW PERIODS
		Small Terrestrial Game (Reptiles, Birds)	N/A	1201	N/A	0.032	Assume all shellfish and mudfish identical					average wood productivity in agroforestry (t/ha)	12.9	All cited in Kay and Kaplan 2015				Fallow Years	Active Years
		Fish and Shellfish	N/A	830	N/A	0.06						average wood productivity in agroforestry (kg/m2)	1.29				Terrace Fields:	0 years	All years
					Starch %:	0.762						wood caloric value (MJ/kg)	20				Swidden Fields:	6 years	3 years
CROPS											DOMESTIC ANIMALS						WOODLOT (FUEL)		Total Fuel:	63.9		HUNTING				WASTE FOR SETTLEMENT
	Wet Rice		Total Area:	72.7634							PIGS						Fuel wood for cooking						Density of CAR (people/100 km2)	514.879	1903 Census
		kcal from crop per person per yr	260931		Surplus Fraction	0.3						kcal per person per year from pig meat	8154.1										density (people/ha)	0.0514879			Wet Rice
		save for planting next year (fraction)	0.02	Bray	Area for Surplus	16.7915						kg meat needed per person per year	3.44055					Thai per capita energy comsumption (GJ/capita/yr)	8	System cited from:			ha/person	19.422				NPP (g C ha-1 yr-1)	6500000
		waste and loss (fraction)	0.3									Pigs per person	0.344399					Thai per capita energy comsumption (MJ/capita/yr)	8000	Kay and Kaplan 2015			fraction of diet from wild game	0.063				above ground fraction	0.796	Kay and Kaplan 2015
		kcal/ha net	3.97188e+06									kcal for pig per year per person	199571					Thai per capita wood consumption (kg/capita/yr)	400				hunting area (ha)	1042.5				weed fraction	0.1	Gregg 1988
		area of crop needed per person (ha)	0.0656946									Waste Fraction of Pig Diet	0.9	1				India per capita fuel wood consumption (kg/capita/yr)	551									Above ground biomass (g C ha^-1 yr-1)	10348000	1/.45 converts C to dry matter
		area of crop needed per village (ha)	55.9718									Forage Fraction of Pig Diet	0.1					per capita fuel wood consumption (GJ/capita/yr)	11.02									Harvest Index	0.23
																		average between India and Thai (kg wood/capita/yr)	475.5									Waste per person (g dry matter/yr)	523452
												Area of forest necessary per person (ha)	0.0534117					kg wood necessary for the whole village	405126									Waste for Village (g dry matter/yr)	4.45981e+08
	Swidden		Combined area------->	90.0812								total area for pig per person (ha)	0.0534117					m2 of forest for wood production	314051
		Yam (iuktu)										total area for pigs per village (ha)	45.5068					ha of forest for wood production	31.4051								Yams
		kcal from crop per person per yr	171236		Surplus Fraction:							total pigs per village	293.428															NPP (g C m-2 yr-1)	6500000
		save for planting next year (fraction)	0.1		Yam (ubi)	0.1						Total Caloric Need for all Pigs in Settlement	1.70034e+08															above ground fraction	0.6	Default for Root crops (Taro and Yam)
		waste and loss (fraction)	0.3		Taro (gabe)	0											Ceramics											weed fraction	0.1
		kcal/ha net	2850000		Squash (kalabasa)	0												vessels per household per year	30	Kay and Kaplan 2015								Above ground biomass (g C m^-2 yr-1)	7800000
		area of crop needed per person (ha)	0.0600828		Sweet Potato (Camote)	0.1												average weight of a vessel (kg)	1.5	Estimate								Harvest Index	0.5	Default, mid-estimate for harvest yield of grains and intensely cultivated plants (0.4-0.6)
		area of crop needed per village (ha)	51.1906		Area for Surplus	5.11906					CARABAO							weight of ceramics p.p. (kg yr-1)	45									Waste per person (gC/yr)	234323
												kcal per person per year from carabao meat	815.41					charcoal : ceramics ratio	2	Kay and Kaplan 2015								Waste for Village (gC/yr)	1.99643e+08
		Taro (aba)										kg meat needed per person per year	0.608515					charcoal : wood ratio	4
		kcal from crop per person per yr	17939		Proportion of taro in terraces	1						carabao per person	0.018963					wood needed p. p. for ceramics per year (kg)	360								Taro
		save for planting next year (fraction)	0.1									kcal for carabao per year per person	124576					wood needed p. p. for ceramics per year (GJ)	7.2									NPP (g C m-2 yr-1)	6500000			Raw leaves are poisonous. Cooked, they are consumable
		waste and loss (fraction)	0.3		Terrace taro (ha)	11.4745						pasture grasses fraction of carabao diet	0.6	1	Ratios from Kay and Kaplan 2015			wood for village from ceramics (kg)	306720									above ground fraction	0.59	Hartemink et al 2000
		kcal/ha net	1332000									pasture legumes fraction of carabao diet	0.1					area for woodlot for ceramics (ha)	0	Grasses, twigs only. Maher 1984								weed fraction	0.1
		area of crop needed per person (ha)	0.0134677									straw fraction of carabao diet	0.3															Above ground biomass (g C m^-2 yr-1)	7670000
		area of crop needed per village (ha)	11.4745									area of pasture grasses necessary per person (ha)	0.0735398					All constants cited in Kay and Kaplan 2015										Harvest Index	0.52	Russell and Brown 1998, Hartemink et al 2000
												area of pasture legumes necessary per person (ha)	0.00827366															Waste per person (gC/yr)	49582.8
		Squash (Kalabasa)			Proportion of Squash on Terrace Bunding	1						total area for carabao per person (ha)	0.0818135															Waste for Village (gC/yr)	4.22445e+07
		kcal from crop per person per yr	12231.1									total area for carabao per village (ha)	69.7051				Iron Working
		save for planting next year (fraction)	0									total carabao per village	16.1565					Iron per capita per year (kg)	1.5	Kay and Kaplan 2015							Deer Meat
		waste and loss (fraction)	0.3		Terrace Squash (ha)	3.02582												charcoal : iron ratio	82	Sauder and Williams 2002								Fraction of Deer that is Meat	26.7421		Note, Deer waste is a high estimate.
		kcal/ha net	3444000									ALL ANIMALS DISTRIBUTED DURING FEASTS, USE FULL POPULATION!						charcoal : wood ratio	4									Weight of Deer (kg)	68		Includes head, skin, innards, legs. These parts may not have returned to the village.
		area of crop needed per person (ha)	0.00355144															wood needed p. p. for iron (kg yr-1)	492									Waste per Deer (kg)	41.2579		Field dressing would have removed several portions
		area of crop needed per village (ha)	3.02582								GOATS							wood needed p. p. for iron (GJ yr-1)	9.84									Calories per Deer for Humans	23800.5
												kcal per person per year from goat meat	0					wood for village from ironworking (kg)	419184									Calories per Deer for Waste	36719.5
		Sweet Potato (gattuk)										kg meat needed per person per year	0					area for woodlot for iron (ha)	32.4949									Calories from deer per person per year	13046.6
		kcal from crop per person per yr	171236		Area for Surplus	3.07014						goat per person	0															Deer consumed per person per year	0.548164
		save for planting next year (fraction)	0.1									kcal for goat per year per person	0					All constants cited in Kay and Kaplan 2015										Deer consumed for village per year	467.036
		waste and loss (fraction)	0.3									pasture grasses fraction of goat diet	0.65	1														Deer Waste Generated in village per year (kg)	19268.9
		kcal/ha net	4752000									pasture legumes fraction of goat diet	0.1															Deer Waste Generated in village per year (kcal)	1.71493e+07
		area of crop needed per person (ha)	0.0360345									forest browse fraction of goat diet	0.25				MUYONG PRIVATELY OWNED, COMMUNALLY USED FOR FUEL. TOTAL POP. NEEDS DETERMINE TOTAL MUYONG AREA										Mudfish Meat
		area of crop needed per village (ha)	30.7014									area of pasture grasses necessary per person (ha)	0															Fraction of Fish that is Meat	0.9	Aggregate of adult fish and fry (which are consumed whole)
												area of pasture legumes necessary per person (ha)	0															Weight of Fish (kg)	0.2	agriculture.com.ph
												area of forest necessary per person (ha)	0															Waste per Mudfish (kg)	0.02
												total area for goat per person (ha)	0															Calories per Fish for Humans	149.4
	Agroforestry		Combined Area	4.53133								total area for goat per village (ha)	0															Calories from fish per person per year	48924.6
	Banana											total goat per village	0															Fish consumed per person per year	327.474
		kcal from crop per person per yr	20385.2																									Fish consumed by village per year	279008	Fish from Payo plus river.
		save for planting next year (fraction)	0																									Fish Waste Generated in village per year (kg)	5580.16
		waste and loss (fraction)	0.3																									Caloric Value of Fish Waste Generated in village each year	6.70177e+06
		kcal/ha net	3.83292e+06
		area of crop needed per person (ha)	0.00531846																								Human Excrement
		area of crop needed per village (ha)	4.53133																									human excrement per day per person (kg)	0.5	Gregg 1988
																												human excrement (kg excrement yr-1)	182.5
																												kcal per kg of human excrement	890
																												kcal from human excrement per person yr-1	162425
																												Human excrement for settlement (kg/yr)	155490
																												kcal from human excrement for whole village per year	138386100

## Sheet: High Calories 1800
Ifugao Circle Diagram
Timepoint:	1800
Type:	Template
	SUMMARY OF LAND USE
	Item Number	Category	Area (ha)	Tier
	1	Settlement	5.55	1
	2	Terracing (Payo)	130.718	2
	3	Active Swidden Fields (Uma)	139.786	3
	4	Fallow Swidden Fields (Uma)	279.572	4
	5	Pastureland	104.141	4
	6	Agroforestry (Muyong)	7.03161	5
	7	Woodlot (Fuel) (Muyong)	85.2	5
	8	Forest Browse (Pigs)	67.988	6
	9	Total Hunting Land	1390	6
	10	SUM TOTAL INTENSIVE LAND	819.986	N/A
	11	ALL LAND	2209.98	N/A
DIETARY & POPULATION PARAMETERS
Productivity and Calorimetry of Ifugao Foods											Human Parameters						ANIMAL PARAMETERS									Waste Totals
		Crop/Animal	Productivity (kg/ha)	Energy (Cal/kg)	Energy Yield (Cal/ha)	Proportion of Full Diet	Notes					human kcal per day	2600	From Kay and Kaplan 2015				domestic pig weight (kg)	45			ratio of meat per cow from herd : cow weight	0.0736	kay and kaplan 2015, derived from Gregg 1988				kg/yr	Kcal/yr			Pigs in Village:	455.335
	Crops	Wet Rice	1650	3540	5841000	0.32						human kcal per year	949000					Carabao Weight (kg)	436	M&F Ave		ratio of meat per pig from herd: pig weight	0.222	Gregg 1988, p. 122: 40 kg usable meat (which is 30% of live weight) per year / litter size of 6 per year / neolithic pig weight of 30 kg.			Rice Waste	692063	3.3219e+08			Calories per pig per year	557907
		Sweet Potato	6000	1320	7920000	0.21												Goat Weight (kg)	35			ratio of meat per goat from herd: goat weight	0.113	kay and kaplan 2015, derived from Gregg 1988			Yam Waste	309802	1.48705e+08			Calories for all pigs per year	2.54035e+08
		Taro	2000	1110	2220000	0.022																					Taro Waste	65554.1	1.57985e+07
		Purple Yam	5000	950	4750000	0.21																					Deer Waste	29901	2.66119e+07
		Banana	5070	1080	5475600	0.025					OKV Settlement Data									productivity	caloric content	energy per area					Fish Waste	8659.15	4.15639e+06			Is Calories from waste greater than calories for pigs?	YES
		Arrowroot	N/A	N/A	N/A	0						Parameter	Value	Source						(kg/ha)	(kcal/kg)	(kcal/ha)	NOTES				Human Waste	207320	184514800			Proportion of Pig Diet made from Waste:	2.80268
		Breadfruit	N/A	N/A	N/A	0						Population	1136					Feeds	pasture grasses	700	1452	1016400	Kay and Kaplan 2015				Total	1.3133e+06	7.11977e+08			If Deer and Fish Excluded?	2.68156
		Squashes	12000	410	4920000	0.015						Households	284	Molano (Scott 1974)					pasture legumes	700	2151	1505700	Kay and Kaplan 2015									If Deer, Fish, and Taro Excluded?	2.61937
		Garden Foods (Settlement/Bunding)	N/A	N/A	N/A	0.035						People per Household	4						forest browse			373646	Kay and Kaplan 2015									If Deer, Fish, Taro, and Rice Excluded?	1.31171
	Domestic Animals	Domestic Pig	N/A	2370	N/A	0.01	Ritual sacrifice,					Estimated Area of Settlement (ha)	5.55	See Section 3.3.1					straw	3408	1122	3823776	Kay and Kaplan 2015
		Chicken	N/A	1730	N/A	0.01	Ritual sacrifice,					Hectares/person in village	0.00488556						Human Excrement	n/a	890	n/a	Gregg 1988
		Dog	N/A	1201	N/A	0.005
		Water Buffalo (Carabao)	N/A	1340	N/A	0.001	Ritual animal,					Sub-Population Name	All People
		Goat	N/A	1480	N/A	0						Sub-Population Number of People	1136
		Chicken Eggs	N/A	1600	N/A	0.014																				Plant Waste ME (kcal/kg)	480	CINE, Morong Aetas, Sweet Potato Leaves
	Wild Animals	Wild Pig	N/A	2370	N/A	0.015																				Taro Boiled Leaves (kcal/kg)	241	USDA
		Wild Deer	N/A	890	N/A	0.016					Fuel						FALLOW PERIODS
		Small Terrestrial Game (Reptiles, Birds)	N/A	1201	N/A	0.032	Assume all shellfish and mudfish identical					average wood productivity in agroforestry (t/ha)	12.9	All cited in Kay and Kaplan 2015				Fallow Years	Active Years
		Fish and Shellfish	N/A	830	N/A	0.06						average wood productivity in agroforestry (kg/m2)	1.29				Terrace Fields:	0 years	All years
					Starch %:	0.762						wood caloric value (MJ/kg)	20				Swidden Fields:	6 years	3 years
CROPS											DOMESTIC ANIMALS						WOODLOT (FUEL)		Total Fuel:	85.2		HUNTING				WASTE FOR SETTLEMENT
	Wet Rice		Total Area:	112.912							PIGS						Fuel wood for cooking						Density of CAR (people/100 km2)	514.879	1903 Census
		kcal from crop per person per yr	303680		Surplus Fraction	0.3						kcal per person per year from pig meat	9490										density (people/ha)	0.0514879			Wet Rice
		save for planting next year (fraction)	0.02	Bray	Area for Surplus	26.0567						kg meat needed per person per year	4.00422					Thai per capita energy comsumption (GJ/capita/yr)	8	System cited from:			ha/person	19.422				NPP (g C ha-1 yr-1)	6500000
		waste and loss (fraction)	0.3									Pigs per person	0.400823					Thai per capita energy comsumption (MJ/capita/yr)	8000	Kay and Kaplan 2015			fraction of diet from wild game	0.063				above ground fraction	0.796	Kay and Kaplan 2015
		kcal/ha net	3.97188e+06									kcal for pig per year per person	223622					Thai per capita wood consumption (kg/capita/yr)	400				hunting area (ha)	1390				weed fraction	0.1	Gregg 1988
		area of crop needed per person (ha)	0.0764575									Waste Fraction of Pig Diet	0.9	1				India per capita fuel wood consumption (kg/capita/yr)	551									Above ground biomass (g C ha^-1 yr-1)	10348000	1/.45 converts C to dry matter
		area of crop needed per village (ha)	86.8557									Forage Fraction of Pig Diet	0.1					per capita fuel wood consumption (GJ/capita/yr)	11.02									Harvest Index	0.23
																		average between India and Thai (kg wood/capita/yr)	475.5									Waste per person (g dry matter/yr)	609210
												Area of forest necessary per person (ha)	0.0598486					kg wood necessary for the whole village	540168									Waste for Village (g dry matter/yr)	6.92063e+08
	Swidden		Combined area------->	139.786								total area for pig per person (ha)	0.0598486					m2 of forest for wood production	418735
		Yam (iuktu)										total area for pigs per village (ha)	67.988					ha of forest for wood production	41.8735								Yams
		kcal from crop per person per yr	199290		Surplus Fraction:							total pigs per village	455.335															NPP (g C m-2 yr-1)	6500000
		save for planting next year (fraction)	0.1		Yam (ubi)	0.1						Total Caloric Need for all Pigs in Settlement	2.54035e+08															above ground fraction	0.6	Default for Root crops (Taro and Yam)
		waste and loss (fraction)	0.3		Taro (gabe)	0											Ceramics											weed fraction	0.1
		kcal/ha net	2850000		Squash (kalabasa)	0												vessels per household per year	30	Kay and Kaplan 2015								Above ground biomass (g C m^-2 yr-1)	7800000
		area of crop needed per person (ha)	0.0699263		Sweet Potato (Camote)	0.1												average weight of a vessel (kg)	1.5	Estimate								Harvest Index	0.5	Default, mid-estimate for harvest yield of grains and intensely cultivated plants (0.4-0.6)
		area of crop needed per village (ha)	79.4363		Area for Surplus	7.94363					CARABAO							weight of ceramics p.p. (kg yr-1)	45									Waste per person (gC/yr)	272713
												kcal per person per year from carabao meat	949					charcoal : ceramics ratio	2	Kay and Kaplan 2015								Waste for Village (gC/yr)	3.09802e+08
		Taro (aba)										kg meat needed per person per year	0.708209					charcoal : wood ratio	4
		kcal from crop per person per yr	20878		Proportion of taro in terraces	1						carabao per person	0.0220697					wood needed p. p. for ceramics per year (kg)	360								Taro
		save for planting next year (fraction)	0.1									kcal for carabao per year per person	139590					wood needed p. p. for ceramics per year (GJ)	7.2									NPP (g C m-2 yr-1)	6500000			Raw leaves are poisonous. Cooked, they are consumable
		waste and loss (fraction)	0.3		Terrace taro (ha)	17.8059						pasture grasses fraction of carabao diet	0.6	1	Ratios from Kay and Kaplan 2015			wood for village from ceramics (kg)	408960									above ground fraction	0.59	Hartemink et al 2000
		kcal/ha net	1332000									pasture legumes fraction of carabao diet	0.1					area for woodlot for ceramics (ha)	0	Grasses, twigs only. Maher 1984								weed fraction	0.1
		area of crop needed per person (ha)	0.0156742									straw fraction of carabao diet	0.3															Above ground biomass (g C m^-2 yr-1)	7670000
		area of crop needed per village (ha)	17.8059									area of pasture grasses necessary per person (ha)	0.0824025					All constants cited in Kay and Kaplan 2015										Harvest Index	0.52	Russell and Brown 1998, Hartemink et al 2000
												area of pasture legumes necessary per person (ha)	0.00927076															Waste per person (gC/yr)	57706
		Squash (Kalabasa)			Proportion of Squash on Terrace Bunding	1						total area for carabao per person (ha)	0.0916732															Waste for Village (gC/yr)	6.55541e+07
		kcal from crop per person per yr	14235									total area for carabao per village (ha)	104.141				Iron Working
		save for planting next year (fraction)	0									total carabao per village	25.0712					Iron per capita per year (kg)	1.5	Kay and Kaplan 2015							Deer Meat
		waste and loss (fraction)	0.3		Terrace Squash (ha)	4.6954												charcoal : iron ratio	82	Sauder and Williams 2002								Fraction of Deer that is Meat	26.7421		Note, Deer waste is a high estimate.
		kcal/ha net	3444000									ALL ANIMALS DISTRIBUTED DURING FEASTS, USE FULL POPULATION!						charcoal : wood ratio	4									Weight of Deer (kg)	68		Includes head, skin, innards, legs. These parts may not have returned to the village.
		area of crop needed per person (ha)	0.00413328															wood needed p. p. for iron (kg yr-1)	492									Waste per Deer (kg)	41.2579		Field dressing would have removed several portions
		area of crop needed per village (ha)	4.6954								GOATS							wood needed p. p. for iron (GJ yr-1)	9.84									Calories per Deer for Humans	23800.5
												kcal per person per year from goat meat	0					wood for village from ironworking (kg)	558912									Calories per Deer for Waste	36719.5
		Sweet Potato (gattuk)										kg meat needed per person per year	0					area for woodlot for iron (ha)	43.3265									Calories from deer per person per year	15184
		kcal from crop per person per yr	199290		Area for Surplus	4.76417						goat per person	0															Deer consumed per person per year	0.63797
		save for planting next year (fraction)	0.1									kcal for goat per year per person	0					All constants cited in Kay and Kaplan 2015										Deer consumed for village per year	724.734
		waste and loss (fraction)	0.3									pasture grasses fraction of goat diet	0.65	1														Deer Waste Generated in village per year (kg)	29901
		kcal/ha net	4752000									pasture legumes fraction of goat diet	0.1															Deer Waste Generated in village per year (kcal)	2.66119e+07
		area of crop needed per person (ha)	0.0419381									forest browse fraction of goat diet	0.25				MUYONG PRIVATELY OWNED, COMMUNALLY USED FOR FUEL. TOTAL POP. NEEDS DETERMINE TOTAL MUYONG AREA										Mudfish Meat
		area of crop needed per village (ha)	47.6417									area of pasture grasses necessary per person (ha)	0															Fraction of Fish that is Meat	0.9	Aggregate of adult fish and fry (which are consumed whole)
												area of pasture legumes necessary per person (ha)	0															Weight of Fish (kg)	0.2	agriculture.com.ph
												area of forest necessary per person (ha)	0															Waste per Mudfish (kg)	0.02
												total area for goat per person (ha)	0															Calories per Fish for Humans	149.4
	Agroforestry		Combined Area	7.03161								total area for goat per village (ha)	0															Calories from fish per person per year	56940
	Banana											total goat per village	0															Fish consumed per person per year	381.124
		kcal from crop per person per yr	23725																									Fish consumed by village per year	432957	Fish from Payo plus river.
		save for planting next year (fraction)	0																									Fish Waste Generated in village per year (kg)	8659.15
		waste and loss (fraction)	0.3																									Caloric Value of Fish Waste Generated in village each year	1.03996e+07
		kcal/ha net	3.83292e+06
		area of crop needed per person (ha)	0.0061898																								Human Excrement
		area of crop needed per village (ha)	7.03161																									human excrement per day per person (kg)	0.5	Gregg 1988
																												human excrement (kg excrement yr-1)	182.5
																												kcal per kg of human excrement	890
																												kcal from human excrement per person yr-1	162425
																												Human excrement for settlement (kg/yr)	207320
																												kcal from human excrement for whole village per year	184514800

## Sheet: 1800 HYRice
Ifugao Circle Diagram
Timepoint:	1800
Type:	High Yield Rice
	SUMMARY OF LAND USE
	Item Number	Category	Area (ha)	Tier
	1	Settlement	5.55	1
	2	Terracing (Payo)	79.3311	2
	3	Active Swidden Fields (Uma)	120.108	3
	4	Fallow Swidden Fields (Uma)	240.217	4
	5	Pastureland	92.9401	4
	6	Agroforestry (Muyong)	6.04178	5
	7	Woodlot (Fuel) (Muyong)	85.2	5
	8	Forest Browse (Pigs)	60.6757	6
	9	Total Hunting Land	1390	6
	10	SUM TOTAL INTENSIVE LAND	690.064	N/A
	11	ALL LAND	2080.06	N/A
DIETARY & POPULATION PARAMETERS
Productivity and Calorimetry of Ifugao Foods											Human Parameters						ANIMAL PARAMETERS									Waste Totals
		Crop/Animal	Productivity (kg/ha)	Energy (Cal/kg)	Energy Yield (Cal/ha)	Proportion of Full Diet	Notes					human kcal per day	2234	From Kay and Kaplan 2015				domestic pig weight (kg)	45			ratio of meat per cow from herd : cow weight	0.0736	kay and kaplan 2015, derived from Gregg 1988				kg/yr	Kcal/yr			Pigs in Village:	391.238
	Crops	Wet Rice	2500	3540	8850000	0.32						human kcal per year	815410					Carabao Weight (kg)	436	M&F Ave		ratio of meat per pig from herd: pig weight	0.222	Gregg 1988, p. 122: 40 kg usable meat (which is 30% of live weight) per year / litter size of 6 per year / neolithic pig weight of 30 kg.			Rice Waste	392464	1.88382e+08			Calories per pig per year	579475
		Sweet Potato	6000	1320	7920000	0.21												Goat Weight (kg)	35			ratio of meat per goat from herd: goat weight	0.113	kay and kaplan 2015, derived from Gregg 1988			Yam Waste	266191	1.27772e+08			Calories for all pigs per year	2.26712e+08
		Taro	2000	1110	2220000	0.022																					Taro Waste	56326.1	1.35746e+07
		Purple Yam	5000	950	4750000	0.21																					Deer Waste	25691.9	2.28658e+07
		Banana	5070	1080	5475600	0.025					OKV Settlement Data									productivity	caloric content	energy per area					Fish Waste	7440.21	3.5713e+06			Is Calories from waste greater than calories for pigs?	YES
		Arrowroot	N/A	N/A	N/A	0						Parameter	Value	Source						(kg/ha)	(kcal/kg)	(kcal/ha)	NOTES				Human Waste	207320	184514800			Proportion of Pig Diet made from Waste:	2.38487
		Breadfruit	N/A	N/A	N/A	0						Population	1136					Feeds	pasture grasses	700	1452	1016400	Kay and Kaplan 2015				Total	955433	5.40681e+08			If Deer and Fish Excluded?	2.26826
		Squashes	12000	410	4920000	0.015						Households	284	Molano (Scott 1974)					pasture legumes	700	2151	1505700	Kay and Kaplan 2015									If Deer, Fish, and Taro Excluded?	2.20839
		Garden Foods (Settlement/Bunding)	N/A	N/A	N/A	0.035						People per Household	4						forest browse			373646	Kay and Kaplan 2015									If Deer, Fish, Taro, and Rice Excluded?	1.37746
	Domestic Animals	Domestic Pig	N/A	2370	N/A	0.01	Ritual sacrifice,					Estimated Area of Settlement (ha)	5.55	See Section 3.3.1					straw	3408	1122	3823776	Kay and Kaplan 2015
		Chicken	N/A	1730	N/A	0.01	Ritual sacrifice,					Hectares/person in village	0.00488556						Human Excrement	n/a	890	n/a	Gregg 1988
		Dog	N/A	1201	N/A	0.005
		Water Buffalo (Carabao)	N/A	1340	N/A	0.001	Ritual animal,					Sub-Population Name	All People
		Goat	N/A	1480	N/A	0						Sub-Population Number of People	1136
		Chicken Eggs	N/A	1600	N/A	0.014																				Plant Waste ME (kcal/kg)	480	CINE, Morong Aetas, Sweet Potato Leaves
	Wild Animals	Wild Pig	N/A	2370	N/A	0.015																				Taro Boiled Leaves (kcal/kg)	241	USDA
		Wild Deer	N/A	890	N/A	0.016					Fuel						FALLOW PERIODS
		Small Terrestrial Game (Reptiles, Birds)	N/A	1201	N/A	0.032	Assume all shellfish and mudfish identical					average wood productivity in agroforestry (t/ha)	12.9	All cited in Kay and Kaplan 2015				Fallow Years	Active Years
		Fish and Shellfish	N/A	830	N/A	0.06						average wood productivity in agroforestry (kg/m2)	1.29				Terrace Fields:	0 years	All years
					Starch %:	0.762						wood caloric value (MJ/kg)	20				Swidden Fields:	6 years	3 years
CROPS											DOMESTIC ANIMALS						WOODLOT (FUEL)		Total Fuel:	85.2		HUNTING				WASTE FOR SETTLEMENT
	Wet Rice		Total Area:	64.0318							PIGS						Fuel wood for cooking						Density of CAR (people/100 km2)	514.879	1903 Census
		kcal from crop per person per yr	260931		Surplus Fraction	0.3						kcal per person per year from pig meat	8154.1										density (people/ha)	0.0514879			Wet Rice
		save for planting next year (fraction)	0.02	Bray	Area for Surplus	14.7766						kg meat needed per person per year	3.44055					Thai per capita energy comsumption (GJ/capita/yr)	8	System cited from:			ha/person	19.422				NPP (g C ha-1 yr-1)	6500000
		waste and loss (fraction)	0.3									Pigs per person	0.344399					Thai per capita energy comsumption (MJ/capita/yr)	8000	Kay and Kaplan 2015			fraction of diet from wild game	0.063				above ground fraction	0.796	Kay and Kaplan 2015
		kcal/ha net	6.018e+06									kcal for pig per year per person	199571					Thai per capita wood consumption (kg/capita/yr)	400				hunting area (ha)	1390				weed fraction	0.1	Gregg 1988
		area of crop needed per person (ha)	0.0433585									Waste Fraction of Pig Diet	0.9	1				India per capita fuel wood consumption (kg/capita/yr)	551									Above ground biomass (g C ha^-1 yr-1)	10348000	1/.45 converts C to dry matter
		area of crop needed per village (ha)	49.2552									Forage Fraction of Pig Diet	0.1					per capita fuel wood consumption (GJ/capita/yr)	11.02									Harvest Index	0.23
																		average between India and Thai (kg wood/capita/yr)	475.5									Waste per person (g dry matter/yr)	345478
												Area of forest necessary per person (ha)	0.0534117					kg wood necessary for the whole village	540168									Waste for Village (g dry matter/yr)	3.92464e+08
	Swidden		Combined area------->	120.108								total area for pig per person (ha)	0.0534117					m2 of forest for wood production	418735
		Yam (iuktu)										total area for pigs per village (ha)	60.6757					ha of forest for wood production	41.8735								Yams
		kcal from crop per person per yr	171236		Surplus Fraction:							total pigs per village	391.238															NPP (g C m-2 yr-1)	6500000
		save for planting next year (fraction)	0.1		Yam (ubi)	0.1						Total Caloric Need for all Pigs in Settlement	2.26712e+08															above ground fraction	0.6	Default for Root crops (Taro and Yam)
		waste and loss (fraction)	0.3		Taro (gabe)	0											Ceramics											weed fraction	0.1
		kcal/ha net	2850000		Squash (kalabasa)	0												vessels per household per year	30	Kay and Kaplan 2015								Above ground biomass (g C m^-2 yr-1)	7800000
		area of crop needed per person (ha)	0.0600828		Sweet Potato (Camote)	0.1												average weight of a vessel (kg)	1.5	Estimate								Harvest Index	0.5	Default, mid-estimate for harvest yield of grains and intensely cultivated plants (0.4-0.6)
		area of crop needed per village (ha)	68.2541		Area for Surplus	6.82541					CARABAO							weight of ceramics p.p. (kg yr-1)	45									Waste per person (gC/yr)	234323
												kcal per person per year from carabao meat	815.41					charcoal : ceramics ratio	2	Kay and Kaplan 2015								Waste for Village (gC/yr)	2.66191e+08
		Taro (aba)										kg meat needed per person per year	0.608515					charcoal : wood ratio	4
		kcal from crop per person per yr	17939		Proportion of taro in terraces	1						carabao per person	0.018963					wood needed p. p. for ceramics per year (kg)	360								Taro
		save for planting next year (fraction)	0.1									kcal for carabao per year per person	124576					wood needed p. p. for ceramics per year (GJ)	7.2									NPP (g C m-2 yr-1)	6500000			Raw leaves are poisonous. Cooked, they are consumable
		waste and loss (fraction)	0.3		Terrace taro (ha)	15.2993						pasture grasses fraction of carabao diet	0.6	1	Ratios from Kay and Kaplan 2015			wood for village from ceramics (kg)	408960									above ground fraction	0.59	Hartemink et al 2000
		kcal/ha net	1332000									pasture legumes fraction of carabao diet	0.1					area for woodlot for ceramics (ha)	0	Grasses, twigs only. Maher 1984								weed fraction	0.1
		area of crop needed per person (ha)	0.0134677									straw fraction of carabao diet	0.3															Above ground biomass (g C m^-2 yr-1)	7670000
		area of crop needed per village (ha)	15.2993									area of pasture grasses necessary per person (ha)	0.0735398					All constants cited in Kay and Kaplan 2015										Harvest Index	0.52	Russell and Brown 1998, Hartemink et al 2000
												area of pasture legumes necessary per person (ha)	0.00827366															Waste per person (gC/yr)	49582.8
		Squash (Kalabasa)			Proportion of Squash on Terrace Bunding	1						total area for carabao per person (ha)	0.0818135															Waste for Village (gC/yr)	5.63261e+07
		kcal from crop per person per yr	12231.1									total area for carabao per village (ha)	92.9401				Iron Working
		save for planting next year (fraction)	0									total carabao per village	21.542					Iron per capita per year (kg)	1.5	Kay and Kaplan 2015							Deer Meat
		waste and loss (fraction)	0.3		Terrace Squash (ha)	4.03443												charcoal : iron ratio	82	Sauder and Williams 2002								Fraction of Deer that is Meat	26.7421		Note, Deer waste is a high estimate.
		kcal/ha net	3444000									ALL ANIMALS DISTRIBUTED DURING FEASTS, USE FULL POPULATION!						charcoal : wood ratio	4									Weight of Deer (kg)	68		Includes head, skin, innards, legs. These parts may not have returned to the village.
		area of crop needed per person (ha)	0.00355144															wood needed p. p. for iron (kg yr-1)	492									Waste per Deer (kg)	41.2579		Field dressing would have removed several portions
		area of crop needed per village (ha)	4.03443								GOATS							wood needed p. p. for iron (GJ yr-1)	9.84									Calories per Deer for Humans	23800.5
												kcal per person per year from goat meat	0					wood for village from ironworking (kg)	558912									Calories per Deer for Waste	36719.5
		Sweet Potato (gattuk)										kg meat needed per person per year	0					area for woodlot for iron (ha)	43.3265									Calories from deer per person per year	13046.6
		kcal from crop per person per yr	171236		Area for Surplus	4.09352						goat per person	0															Deer consumed per person per year	0.548164
		save for planting next year (fraction)	0.1									kcal for goat per year per person	0					All constants cited in Kay and Kaplan 2015										Deer consumed for village per year	622.714
		waste and loss (fraction)	0.3									pasture grasses fraction of goat diet	0.65	1														Deer Waste Generated in village per year (kg)	25691.9
		kcal/ha net	4752000									pasture legumes fraction of goat diet	0.1															Deer Waste Generated in village per year (kcal)	2.28658e+07
		area of crop needed per person (ha)	0.0360345									forest browse fraction of goat diet	0.25				MUYONG PRIVATELY OWNED, COMMUNALLY USED FOR FUEL. TOTAL POP. NEEDS DETERMINE TOTAL MUYONG AREA										Mudfish Meat
		area of crop needed per village (ha)	40.9352									area of pasture grasses necessary per person (ha)	0															Fraction of Fish that is Meat	0.9	Aggregate of adult fish and fry (which are consumed whole)
												area of pasture legumes necessary per person (ha)	0															Weight of Fish (kg)	0.2	agriculture.com.ph
												area of forest necessary per person (ha)	0															Waste per Mudfish (kg)	0.02
												total area for goat per person (ha)	0															Calories per Fish for Humans	149.4
	Agroforestry		Combined Area	6.04178								total area for goat per village (ha)	0															Calories from fish per person per year	48924.6
	Banana											total goat per village	0															Fish consumed per person per year	327.474
		kcal from crop per person per yr	20385.2																									Fish consumed by village per year	372010	Fish from Payo plus river.
		save for planting next year (fraction)	0																									Fish Waste Generated in village per year (kg)	7440.21
		waste and loss (fraction)	0.3																									Caloric Value of Fish Waste Generated in village each year	8.93569e+06
		kcal/ha net	3.83292e+06
		area of crop needed per person (ha)	0.00531846																								Human Excrement
		area of crop needed per village (ha)	6.04178																									human excrement per day per person (kg)	0.5	Gregg 1988
																												human excrement (kg excrement yr-1)	182.5
																												kcal per kg of human excrement	890
																												kcal from human excrement per person yr-1	162425
																												Human excrement for settlement (kg/yr)	207320
																												kcal from human excrement for whole village per year	184514800

## Sheet: 1800 Only Yams
Ifugao Circle Diagram
Timepoint:	1800
Type:	Only Yams/No Camote
	SUMMARY OF LAND USE
	Item Number	Category	Area (ha)	Tier
	1	Settlement	5.55	1
	2	Terracing (Payo)	112.317	2
	3	Active Swidden Fields (Uma)	150.159	3
	4	Fallow Swidden Fields (Uma)	300.318	4
	5	Pastureland	92.9401	4
	6	Agroforestry (Muyong)	6.04178	5
	7	Woodlot (Fuel) (Muyong)	85.2	5
	8	Forest Browse (Pigs)	60.6757	6
	9	Total Hunting Land	1390	6
	10	SUM TOTAL INTENSIVE LAND	813.202	N/A
	11	ALL LAND	2203.2	N/A
DIETARY & POPULATION PARAMETERS
Productivity and Calorimetry of Ifugao Foods											Human Parameters						ANIMAL PARAMETERS									Waste Totals
		Crop/Animal	Productivity (kg/ha)	Energy (Cal/kg)	Energy Yield (Cal/ha)	Proportion of Full Diet	Notes					human kcal per day	2234	From Kay and Kaplan 2015				domestic pig weight (kg)	45			ratio of meat per cow from herd : cow weight	0.0736	kay and kaplan 2015, derived from Gregg 1988				kg/yr	Kcal/yr			Pigs in Village:	391.238
	Crops	Wet Rice	1650	3540	5841000	0.32						human kcal per year	815410					Carabao Weight (kg)	436	M&F Ave		ratio of meat per pig from herd: pig weight	0.222	Gregg 1988, p. 122: 40 kg usable meat (which is 30% of live weight) per year / litter size of 6 per year / neolithic pig weight of 30 kg.			Rice Waste	594642	2.85428e+08			Calories per pig per year	579475
		Sweet Potato	6000	1320	7920000	0												Goat Weight (kg)	35			ratio of meat per goat from herd: goat weight	0.113	kay and kaplan 2015, derived from Gregg 1988			Yam Waste	532382	2.55543e+08			Calories for all pigs per year	2.26712e+08
		Taro	2000	1110	2220000	0.022																					Taro Waste	56326.1	1.35746e+07
		Purple Yam	5000	950	4750000	0.42																					Deer Waste	25691.9	2.28658e+07
		Banana	5070	1080	5475600	0.025					OKV Settlement Data									productivity	caloric content	energy per area					Fish Waste	7440.21	3.5713e+06			Is Calories from waste greater than calories for pigs?	YES
		Arrowroot	N/A	N/A	N/A	0						Parameter	Value	Source						(kg/ha)	(kcal/kg)	(kcal/ha)	NOTES				Human Waste	207320	184514800			Proportion of Pig Diet made from Waste:	3.37652
		Breadfruit	N/A	N/A	N/A	0						Population	1136					Feeds	pasture grasses	700	1452	1016400	Kay and Kaplan 2015				Total	1.4238e+06	7.65498e+08			If Deer and Fish Excluded?	3.2599
		Squashes	12000	410	4920000	0.015						Households	284	Molano (Scott 1974)					pasture legumes	700	2151	1505700	Kay and Kaplan 2015									If Deer, Fish, and Taro Excluded?	3.20003
		Garden Foods (Settlement/Bunding)	N/A	N/A	N/A	0.035						People per Household	4						forest browse			373646	Kay and Kaplan 2015									If Deer, Fish, Taro, and Rice Excluded?	1.94104
	Domestic Animals	Domestic Pig	N/A	2370	N/A	0.01	Ritual sacrifice,					Estimated Area of Settlement (ha)	5.55	See Section 3.3.1					straw	3408	1122	3823776	Kay and Kaplan 2015
		Chicken	N/A	1730	N/A	0.01	Ritual sacrifice,					Hectares/person in village	0.00488556						Human Excrement	n/a	890	n/a	Gregg 1988
		Dog	N/A	1201	N/A	0.005
		Water Buffalo (Carabao)	N/A	1340	N/A	0.001	Ritual animal,					Sub-Population Name	All People
		Goat	N/A	1480	N/A	0						Sub-Population Number of People	1136
		Chicken Eggs	N/A	1600	N/A	0.014																				Plant Waste ME (kcal/kg)	480	CINE, Morong Aetas, Sweet Potato Leaves
	Wild Animals	Wild Pig	N/A	2370	N/A	0.015																				Taro Boiled Leaves (kcal/kg)	241	USDA
		Wild Deer	N/A	890	N/A	0.016					Fuel						FALLOW PERIODS
		Small Terrestrial Game (Reptiles, Birds)	N/A	1201	N/A	0.032	Assume all shellfish and mudfish identical					average wood productivity in agroforestry (t/ha)	12.9	All cited in Kay and Kaplan 2015				Fallow Years	Active Years
		Fish and Shellfish	N/A	830	N/A	0.06						average wood productivity in agroforestry (kg/m2)	1.29				Terrace Fields:	0 years	All years
					Starch %:	0.762						wood caloric value (MJ/kg)	20				Swidden Fields:	6 years	3 years
CROPS											DOMESTIC ANIMALS						WOODLOT (FUEL)		Total Fuel:	85.2		HUNTING				WASTE FOR SETTLEMENT
	Wet Rice		Total Area:	97.0178							PIGS						Fuel wood for cooking						Density of CAR (people/100 km2)	514.879	1903 Census
		kcal from crop per person per yr	260931		Surplus Fraction	0.3						kcal per person per year from pig meat	8154.1										density (people/ha)	0.0514879			Wet Rice
		save for planting next year (fraction)	0.02	Bray	Area for Surplus	22.3887						kg meat needed per person per year	3.44055					Thai per capita energy comsumption (GJ/capita/yr)	8	System cited from:			ha/person	19.422				NPP (g C ha-1 yr-1)	6500000
		waste and loss (fraction)	0.3									Pigs per person	0.344399					Thai per capita energy comsumption (MJ/capita/yr)	8000	Kay and Kaplan 2015			fraction of diet from wild game	0.063				above ground fraction	0.796	Kay and Kaplan 2015
		kcal/ha net	3.97188e+06									kcal for pig per year per person	199571					Thai per capita wood consumption (kg/capita/yr)	400				hunting area (ha)	1390				weed fraction	0.1	Gregg 1988
		area of crop needed per person (ha)	0.0656946									Waste Fraction of Pig Diet	0.9	1				India per capita fuel wood consumption (kg/capita/yr)	551									Above ground biomass (g C ha^-1 yr-1)	10348000	1/.45 converts C to dry matter
		area of crop needed per village (ha)	74.6291									Forage Fraction of Pig Diet	0.1					per capita fuel wood consumption (GJ/capita/yr)	11.02									Harvest Index	0.23
																		average between India and Thai (kg wood/capita/yr)	475.5									Waste per person (g dry matter/yr)	523452
												Area of forest necessary per person (ha)	0.0534117					kg wood necessary for the whole village	540168									Waste for Village (g dry matter/yr)	5.94642e+08
	Swidden		Combined area------->	150.159								total area for pig per person (ha)	0.0534117					m2 of forest for wood production	418735
		Yam (iuktu)										total area for pigs per village (ha)	60.6757					ha of forest for wood production	41.8735								Yams
		kcal from crop per person per yr	342472		Surplus Fraction:							total pigs per village	391.238															NPP (g C m-2 yr-1)	6500000
		save for planting next year (fraction)	0.1		Yam (ubi)	0.1						Total Caloric Need for all Pigs in Settlement	2.26712e+08															above ground fraction	0.6	Default for Root crops (Taro and Yam)
		waste and loss (fraction)	0.3		Taro (gabe)	0											Ceramics											weed fraction	0.1
		kcal/ha net	2850000		Squash (kalabasa)	0												vessels per household per year	30	Kay and Kaplan 2015								Above ground biomass (g C m^-2 yr-1)	7800000
		area of crop needed per person (ha)	0.120166		Sweet Potato (Camote)	0.1												average weight of a vessel (kg)	1.5	Estimate								Harvest Index	0.5	Default, mid-estimate for harvest yield of grains and intensely cultivated plants (0.4-0.6)
		area of crop needed per village (ha)	136.508		Area for Surplus	13.6508					CARABAO							weight of ceramics p.p. (kg yr-1)	45									Waste per person (gC/yr)	468646
												kcal per person per year from carabao meat	815.41					charcoal : ceramics ratio	2	Kay and Kaplan 2015								Waste for Village (gC/yr)	5.32382e+08
		Taro (aba)										kg meat needed per person per year	0.608515					charcoal : wood ratio	4
		kcal from crop per person per yr	17939		Proportion of taro in terraces	1						carabao per person	0.018963					wood needed p. p. for ceramics per year (kg)	360								Taro
		save for planting next year (fraction)	0.1									kcal for carabao per year per person	124576					wood needed p. p. for ceramics per year (GJ)	7.2									NPP (g C m-2 yr-1)	6500000			Raw leaves are poisonous. Cooked, they are consumable
		waste and loss (fraction)	0.3		Terrace taro (ha)	15.2993						pasture grasses fraction of carabao diet	0.6	1	Ratios from Kay and Kaplan 2015			wood for village from ceramics (kg)	408960									above ground fraction	0.59	Hartemink et al 2000
		kcal/ha net	1332000									pasture legumes fraction of carabao diet	0.1					area for woodlot for ceramics (ha)	0	Grasses, twigs only. Maher 1984								weed fraction	0.1
		area of crop needed per person (ha)	0.0134677									straw fraction of carabao diet	0.3															Above ground biomass (g C m^-2 yr-1)	7670000
		area of crop needed per village (ha)	15.2993									area of pasture grasses necessary per person (ha)	0.0735398					All constants cited in Kay and Kaplan 2015										Harvest Index	0.52	Russell and Brown 1998, Hartemink et al 2000
												area of pasture legumes necessary per person (ha)	0.00827366															Waste per person (gC/yr)	49582.8
		Squash (Kalabasa)			Proportion of Squash on Terrace Bunding	1						total area for carabao per person (ha)	0.0818135															Waste for Village (gC/yr)	5.63261e+07
		kcal from crop per person per yr	12231.1									total area for carabao per village (ha)	92.9401				Iron Working
		save for planting next year (fraction)	0									total carabao per village	21.542					Iron per capita per year (kg)	1.5	Kay and Kaplan 2015							Deer Meat
		waste and loss (fraction)	0.3		Terrace Squash (ha)	4.03443												charcoal : iron ratio	82	Sauder and Williams 2002								Fraction of Deer that is Meat	26.7421		Note, Deer waste is a high estimate.
		kcal/ha net	3444000									ALL ANIMALS DISTRIBUTED DURING FEASTS, USE FULL POPULATION!						charcoal : wood ratio	4									Weight of Deer (kg)	68		Includes head, skin, innards, legs. These parts may not have returned to the village.
		area of crop needed per person (ha)	0.00355144															wood needed p. p. for iron (kg yr-1)	492									Waste per Deer (kg)	41.2579		Field dressing would have removed several portions
		area of crop needed per village (ha)	4.03443								GOATS							wood needed p. p. for iron (GJ yr-1)	9.84									Calories per Deer for Humans	23800.5
												kcal per person per year from goat meat	0					wood for village from ironworking (kg)	558912									Calories per Deer for Waste	36719.5
		Sweet Potato (gattuk)										kg meat needed per person per year	0					area for woodlot for iron (ha)	43.3265									Calories from deer per person per year	13046.6
		kcal from crop per person per yr	0		Area for Surplus	0						goat per person	0															Deer consumed per person per year	0.548164
		save for planting next year (fraction)	0.1									kcal for goat per year per person	0					All constants cited in Kay and Kaplan 2015										Deer consumed for village per year	622.714
		waste and loss (fraction)	0.3									pasture grasses fraction of goat diet	0.65	1														Deer Waste Generated in village per year (kg)	25691.9
		kcal/ha net	4752000									pasture legumes fraction of goat diet	0.1															Deer Waste Generated in village per year (kcal)	2.28658e+07
		area of crop needed per person (ha)	0									forest browse fraction of goat diet	0.25				MUYONG PRIVATELY OWNED, COMMUNALLY USED FOR FUEL. TOTAL POP. NEEDS DETERMINE TOTAL MUYONG AREA										Mudfish Meat
		area of crop needed per village (ha)	0									area of pasture grasses necessary per person (ha)	0															Fraction of Fish that is Meat	0.9	Aggregate of adult fish and fry (which are consumed whole)
												area of pasture legumes necessary per person (ha)	0															Weight of Fish (kg)	0.2	agriculture.com.ph
												area of forest necessary per person (ha)	0															Waste per Mudfish (kg)	0.02
												total area for goat per person (ha)	0															Calories per Fish for Humans	149.4
	Agroforestry		Combined Area	6.04178								total area for goat per village (ha)	0															Calories from fish per person per year	48924.6
	Banana											total goat per village	0															Fish consumed per person per year	327.474
		kcal from crop per person per yr	20385.2																									Fish consumed by village per year	372010	Fish from Payo plus river.
		save for planting next year (fraction)	0																									Fish Waste Generated in village per year (kg)	7440.21
		waste and loss (fraction)	0.3																									Caloric Value of Fish Waste Generated in village each year	8.93569e+06
		kcal/ha net	3.83292e+06
		area of crop needed per person (ha)	0.00531846																								Human Excrement
		area of crop needed per village (ha)	6.04178																									human excrement per day per person (kg)	0.5	Gregg 1988
																												human excrement (kg excrement yr-1)	182.5
																												kcal per kg of human excrement	890
																												kcal from human excrement per person yr-1	162425
																												Human excrement for settlement (kg/yr)	207320
																												kcal from human excrement for whole village per year	184514800

## Sheet: 1800 Only Camote
Ifugao Circle Diagram
Timepoint:	1800
Type:	Only Yams/No Camote
	SUMMARY OF LAND USE
	Item Number	Category	Area (ha)	Tier
	1	Settlement	5.55	1
	2	Terracing (Payo)	112.317	2
	3	Active Swidden Fields (Uma)	90.0575	3
	4	Fallow Swidden Fields (Uma)	180.115	4
	5	Pastureland	92.9401	4
	6	Agroforestry (Muyong)	6.04178	5
	7	Woodlot (Fuel) (Muyong)	85.2	5
	8	Forest Browse (Pigs)	60.6757	6
	9	Total Hunting Land	1390	6
	10	SUM TOTAL INTENSIVE LAND	632.897	N/A
	11	ALL LAND	2022.89	N/A
DIETARY & POPULATION PARAMETERS
Productivity and Calorimetry of Ifugao Foods											Human Parameters						ANIMAL PARAMETERS									Waste Totals
		Crop/Animal	Productivity (kg/ha)	Energy (Cal/kg)	Energy Yield (Cal/ha)	Proportion of Full Diet	Notes					human kcal per day	2234	From Kay and Kaplan 2015				domestic pig weight (kg)	45			ratio of meat per cow from herd : cow weight	0.0736	kay and kaplan 2015, derived from Gregg 1988				kg/yr	Kcal/yr			Pigs in Village:	391.238
	Crops	Wet Rice	1650	3540	5841000	0.32						human kcal per year	815410					Carabao Weight (kg)	436	M&F Ave		ratio of meat per pig from herd: pig weight	0.222	Gregg 1988, p. 122: 40 kg usable meat (which is 30% of live weight) per year / litter size of 6 per year / neolithic pig weight of 30 kg.			Rice Waste	594642	2.85428e+08			Calories per pig per year	579475
		Sweet Potato	6000	1320	7920000	0.42												Goat Weight (kg)	35			ratio of meat per goat from herd: goat weight	0.113	kay and kaplan 2015, derived from Gregg 1988			Yam Waste	0	0			Calories for all pigs per year	2.26712e+08
		Taro	2000	1110	2220000	0.022																					Taro Waste	56326.1	1.35746e+07
		Purple Yam	5000	950	4750000	0																					Deer Waste	25691.9	2.28658e+07
		Banana	5070	1080	5475600	0.025					OKV Settlement Data									productivity	caloric content	energy per area					Fish Waste	7440.21	3.5713e+06			Is Calories from waste greater than calories for pigs?	YES
		Arrowroot	N/A	N/A	N/A	0						Parameter	Value	Source						(kg/ha)	(kcal/kg)	(kcal/ha)	NOTES				Human Waste	207320	184514800			Proportion of Pig Diet made from Waste:	2.24935
		Breadfruit	N/A	N/A	N/A	0						Population	1136					Feeds	pasture grasses	700	1452	1016400	Kay and Kaplan 2015				Total	891420	5.09954e+08			If Deer and Fish Excluded?	2.13273
		Squashes	12000	410	4920000	0.015						Households	284	Molano (Scott 1974)					pasture legumes	700	2151	1505700	Kay and Kaplan 2015									If Deer, Fish, and Taro Excluded?	2.07286
		Garden Foods (Settlement/Bunding)	N/A	N/A	N/A	0.035						People per Household	4						forest browse			373646	Kay and Kaplan 2015									If Deer, Fish, Taro, and Rice Excluded?	0.813872
	Domestic Animals	Domestic Pig	N/A	2370	N/A	0.01	Ritual sacrifice,					Estimated Area of Settlement (ha)	5.55	See Section 3.3.1					straw	3408	1122	3823776	Kay and Kaplan 2015
		Chicken	N/A	1730	N/A	0.01	Ritual sacrifice,					Hectares/person in village	0.00488556						Human Excrement	n/a	890	n/a	Gregg 1988
		Dog	N/A	1201	N/A	0.005
		Water Buffalo (Carabao)	N/A	1340	N/A	0.001	Ritual animal,					Sub-Population Name	All People
		Goat	N/A	1480	N/A	0						Sub-Population Number of People	1136
		Chicken Eggs	N/A	1600	N/A	0.014																				Plant Waste ME (kcal/kg)	480	CINE, Morong Aetas, Sweet Potato Leaves
	Wild Animals	Wild Pig	N/A	2370	N/A	0.015																				Taro Boiled Leaves (kcal/kg)	241	USDA
		Wild Deer	N/A	890	N/A	0.016					Fuel						FALLOW PERIODS
		Small Terrestrial Game (Reptiles, Birds)	N/A	1201	N/A	0.032	Assume all shellfish and mudfish identical					average wood productivity in agroforestry (t/ha)	12.9	All cited in Kay and Kaplan 2015				Fallow Years	Active Years
		Fish and Shellfish	N/A	830	N/A	0.06						average wood productivity in agroforestry (kg/m2)	1.29				Terrace Fields:	0 years	All years
					Starch %:	0.762						wood caloric value (MJ/kg)	20				Swidden Fields:	6 years	3 years
CROPS											DOMESTIC ANIMALS						WOODLOT (FUEL)		Total Fuel:	85.2		HUNTING				WASTE FOR SETTLEMENT
	Wet Rice		Total Area:	97.0178							PIGS						Fuel wood for cooking						Density of CAR (people/100 km2)	514.879	1903 Census
		kcal from crop per person per yr	260931		Surplus Fraction	0.3						kcal per person per year from pig meat	8154.1										density (people/ha)	0.0514879			Wet Rice
		save for planting next year (fraction)	0.02	Bray	Area for Surplus	22.3887						kg meat needed per person per year	3.44055					Thai per capita energy comsumption (GJ/capita/yr)	8	System cited from:			ha/person	19.422				NPP (g C ha-1 yr-1)	6500000
		waste and loss (fraction)	0.3									Pigs per person	0.344399					Thai per capita energy comsumption (MJ/capita/yr)	8000	Kay and Kaplan 2015			fraction of diet from wild game	0.063				above ground fraction	0.796	Kay and Kaplan 2015
		kcal/ha net	3.97188e+06									kcal for pig per year per person	199571					Thai per capita wood consumption (kg/capita/yr)	400				hunting area (ha)	1390				weed fraction	0.1	Gregg 1988
		area of crop needed per person (ha)	0.0656946									Waste Fraction of Pig Diet	0.9	1				India per capita fuel wood consumption (kg/capita/yr)	551									Above ground biomass (g C ha^-1 yr-1)	10348000	1/.45 converts C to dry matter
		area of crop needed per village (ha)	74.6291									Forage Fraction of Pig Diet	0.1					per capita fuel wood consumption (GJ/capita/yr)	11.02									Harvest Index	0.23
																		average between India and Thai (kg wood/capita/yr)	475.5									Waste per person (g dry matter/yr)	523452
												Area of forest necessary per person (ha)	0.0534117					kg wood necessary for the whole village	540168									Waste for Village (g dry matter/yr)	5.94642e+08
	Swidden		Combined area------->	90.0575								total area for pig per person (ha)	0.0534117					m2 of forest for wood production	418735
		Yam (iuktu)										total area for pigs per village (ha)	60.6757					ha of forest for wood production	41.8735								Yams
		kcal from crop per person per yr	0		Surplus Fraction:							total pigs per village	391.238															NPP (g C m-2 yr-1)	6500000
		save for planting next year (fraction)	0.1		Yam (ubi)	0.1						Total Caloric Need for all Pigs in Settlement	2.26712e+08															above ground fraction	0.6	Default for Root crops (Taro and Yam)
		waste and loss (fraction)	0.3		Taro (gabe)	0											Ceramics											weed fraction	0.1
		kcal/ha net	2850000		Squash (kalabasa)	0												vessels per household per year	30	Kay and Kaplan 2015								Above ground biomass (g C m^-2 yr-1)	7800000
		area of crop needed per person (ha)	0		Sweet Potato (Camote)	0.1												average weight of a vessel (kg)	1.5	Estimate								Harvest Index	0.5	Default, mid-estimate for harvest yield of grains and intensely cultivated plants (0.4-0.6)
		area of crop needed per village (ha)	0		Area for Surplus	0					CARABAO							weight of ceramics p.p. (kg yr-1)	45									Waste per person (gC/yr)	0
												kcal per person per year from carabao meat	815.41					charcoal : ceramics ratio	2	Kay and Kaplan 2015								Waste for Village (gC/yr)	0
		Taro (aba)										kg meat needed per person per year	0.608515					charcoal : wood ratio	4
		kcal from crop per person per yr	17939		Proportion of taro in terraces	1						carabao per person	0.018963					wood needed p. p. for ceramics per year (kg)	360								Taro
		save for planting next year (fraction)	0.1									kcal for carabao per year per person	124576					wood needed p. p. for ceramics per year (GJ)	7.2									NPP (g C m-2 yr-1)	6500000			Raw leaves are poisonous. Cooked, they are consumable
		waste and loss (fraction)	0.3		Terrace taro (ha)	15.2993						pasture grasses fraction of carabao diet	0.6	1	Ratios from Kay and Kaplan 2015			wood for village from ceramics (kg)	408960									above ground fraction	0.59	Hartemink et al 2000
		kcal/ha net	1332000									pasture legumes fraction of carabao diet	0.1					area for woodlot for ceramics (ha)	0	Grasses, twigs only. Maher 1984								weed fraction	0.1
		area of crop needed per person (ha)	0.0134677									straw fraction of carabao diet	0.3															Above ground biomass (g C m^-2 yr-1)	7670000
		area of crop needed per village (ha)	15.2993									area of pasture grasses necessary per person (ha)	0.0735398					All constants cited in Kay and Kaplan 2015										Harvest Index	0.52	Russell and Brown 1998, Hartemink et al 2000
												area of pasture legumes necessary per person (ha)	0.00827366															Waste per person (gC/yr)	49582.8
		Squash (Kalabasa)			Proportion of Squash on Terrace Bunding	1						total area for carabao per person (ha)	0.0818135															Waste for Village (gC/yr)	5.63261e+07
		kcal from crop per person per yr	12231.1									total area for carabao per village (ha)	92.9401				Iron Working
		save for planting next year (fraction)	0									total carabao per village	21.542					Iron per capita per year (kg)	1.5	Kay and Kaplan 2015							Deer Meat
		waste and loss (fraction)	0.3		Terrace Squash (ha)	4.03443												charcoal : iron ratio	82	Sauder and Williams 2002								Fraction of Deer that is Meat	26.7421		Note, Deer waste is a high estimate.
		kcal/ha net	3444000									ALL ANIMALS DISTRIBUTED DURING FEASTS, USE FULL POPULATION!						charcoal : wood ratio	4									Weight of Deer (kg)	68		Includes head, skin, innards, legs. These parts may not have returned to the village.
		area of crop needed per person (ha)	0.00355144															wood needed p. p. for iron (kg yr-1)	492									Waste per Deer (kg)	41.2579		Field dressing would have removed several portions
		area of crop needed per village (ha)	4.03443								GOATS							wood needed p. p. for iron (GJ yr-1)	9.84									Calories per Deer for Humans	23800.5
												kcal per person per year from goat meat	0					wood for village from ironworking (kg)	558912									Calories per Deer for Waste	36719.5
		Sweet Potato (gattuk)										kg meat needed per person per year	0					area for woodlot for iron (ha)	43.3265									Calories from deer per person per year	13046.6
		kcal from crop per person per yr	342472		Area for Surplus	8.18705						goat per person	0															Deer consumed per person per year	0.548164
		save for planting next year (fraction)	0.1									kcal for goat per year per person	0					All constants cited in Kay and Kaplan 2015										Deer consumed for village per year	622.714
		waste and loss (fraction)	0.3									pasture grasses fraction of goat diet	0.65	1														Deer Waste Generated in village per year (kg)	25691.9
		kcal/ha net	4752000									pasture legumes fraction of goat diet	0.1															Deer Waste Generated in village per year (kcal)	2.28658e+07
		area of crop needed per person (ha)	0.0720691									forest browse fraction of goat diet	0.25				MUYONG PRIVATELY OWNED, COMMUNALLY USED FOR FUEL. TOTAL POP. NEEDS DETERMINE TOTAL MUYONG AREA										Mudfish Meat
		area of crop needed per village (ha)	81.8705									area of pasture grasses necessary per person (ha)	0															Fraction of Fish that is Meat	0.9	Aggregate of adult fish and fry (which are consumed whole)
												area of pasture legumes necessary per person (ha)	0															Weight of Fish (kg)	0.2	agriculture.com.ph
												area of forest necessary per person (ha)	0															Waste per Mudfish (kg)	0.02
												total area for goat per person (ha)	0															Calories per Fish for Humans	149.4
	Agroforestry		Combined Area	6.04178								total area for goat per village (ha)	0															Calories from fish per person per year	48924.6
	Banana											total goat per village	0															Fish consumed per person per year	327.474
		kcal from crop per person per yr	20385.2																									Fish consumed by village per year	372010	Fish from Payo plus river.
		save for planting next year (fraction)	0																									Fish Waste Generated in village per year (kg)	7440.21
		waste and loss (fraction)	0.3																									Caloric Value of Fish Waste Generated in village each year	8.93569e+06
		kcal/ha net	3.83292e+06
		area of crop needed per person (ha)	0.00531846																								Human Excrement
		area of crop needed per village (ha)	6.04178																									human excrement per day per person (kg)	0.5	Gregg 1988
																												human excrement (kg excrement yr-1)	182.5
																												kcal per kg of human excrement	890
																												kcal from human excrement per person yr-1	162425
																												Human excrement for settlement (kg/yr)	207320
																												kcal from human excrement for whole village per year	184514800

## Sheet: 1800 Poor Rice Harvest
Ifugao Circle Diagram
Timepoint:	1800
Type:	Poor Rice Harvest
	SUMMARY OF LAND USE
	Item Number	Category	Area (ha)	Tier
	1	Settlement	5.55	1
	2	Terracing (Payo)	112.317	2
	3	Active Swidden Fields (Uma)	211.619	3
	4	Fallow Swidden Fields (Uma)	423.239	4
	5	Pastureland	92.9401	4
	6	Agroforestry (Muyong)	6.04178	5
	7	Woodlot (Fuel) (Muyong)	85.2	5
	8	Forest Browse (Pigs)	60.6757	6
	9	Total Hunting Land	1390	6
	10	SUM TOTAL INTENSIVE LAND	997.583	N/A
	11	ALL LAND	2387.58	N/A
DIETARY & POPULATION PARAMETERS
Productivity and Calorimetry of Ifugao Foods											Human Parameters						ANIMAL PARAMETERS									Waste Totals
		Crop/Animal	Productivity (kg/ha)	Energy (Cal/kg)	Energy Yield (Cal/ha)	Proportion of Full Diet	Notes					human kcal per day	2234	From Kay and Kaplan 2015				domestic pig weight (kg)	45			ratio of meat per cow from herd : cow weight	0.0736	kay and kaplan 2015, derived from Gregg 1988				kg/yr	Kcal/yr			Pigs in Village:	391.238
	Crops	Wet Rice	1650	3540	5841000	0.32						human kcal per year	815410					Carabao Weight (kg)	436	M&F Ave		ratio of meat per pig from herd: pig weight	0.222	Gregg 1988, p. 122: 40 kg usable meat (which is 30% of live weight) per year / litter size of 6 per year / neolithic pig weight of 30 kg.			Rice Waste	594642	2.85428e+08			Calories per pig per year	579475
		Sweet Potato	6000	1320	7920000	0.37												Goat Weight (kg)	35			ratio of meat per goat from herd: goat weight	0.113	kay and kaplan 2015, derived from Gregg 1988			Yam Waste	469003	2.25122e+08			Calories for all pigs per year	2.26712e+08
		Taro	2000	1110	2220000	0.022																					Taro Waste	56326.1	1.35746e+07
		Purple Yam	5000	950	4750000	0.37																					Deer Waste	25691.9	2.28658e+07
		Banana	5070	1080	5475600	0.025					OKV Settlement Data									productivity	caloric content	energy per area					Fish Waste	7440.21	3.5713e+06			Is Calories from waste greater than calories for pigs?	YES
		Arrowroot	N/A	N/A	N/A	0						Parameter	Value	Source						(kg/ha)	(kcal/kg)	(kcal/ha)	NOTES				Human Waste	207320	184514800			Proportion of Pig Diet made from Waste:	3.24233
		Breadfruit	N/A	N/A	N/A	0						Population	1136					Feeds	pasture grasses	700	1452	1016400	Kay and Kaplan 2015				Total	1.36042e+06	7.35076e+08			If Deer and Fish Excluded?	3.12572
		Squashes	12000	410	4920000	0.015						Households	284	Molano (Scott 1974)					pasture legumes	700	2151	1505700	Kay and Kaplan 2015									If Deer, Fish, and Taro Excluded?	3.06584
		Garden Foods (Settlement/Bunding)	N/A	N/A	N/A	0.035						People per Household	4						forest browse			373646	Kay and Kaplan 2015									If Deer, Fish, Taro, and Rice Excluded?	1.80685
	Domestic Animals	Domestic Pig	N/A	2370	N/A	0.01	Ritual sacrifice,					Estimated Area of Settlement (ha)	5.55	See Section 3.3.1					straw	3408	1122	3823776	Kay and Kaplan 2015
		Chicken	N/A	1730	N/A	0.01	Ritual sacrifice,					Hectares/person in village	0.00488556						Human Excrement	n/a	890	n/a	Gregg 1988
		Dog	N/A	1201	N/A	0.005
		Water Buffalo (Carabao)	N/A	1340	N/A	0.001	Ritual animal,					Sub-Population Name	All People
		Goat	N/A	1480	N/A	0						Sub-Population Number of People	1136
		Chicken Eggs	N/A	1600	N/A	0.014																				Plant Waste ME (kcal/kg)	480	CINE, Morong Aetas, Sweet Potato Leaves
	Wild Animals	Wild Pig	N/A	2370	N/A	0.015																				Taro Boiled Leaves (kcal/kg)	241	USDA
		Wild Deer	N/A	890	N/A	0.016					Fuel						FALLOW PERIODS
		Small Terrestrial Game (Reptiles, Birds)	N/A	1201	N/A	0.032	Assume all shellfish and mudfish identical					average wood productivity in agroforestry (t/ha)	12.9	All cited in Kay and Kaplan 2015				Fallow Years	Active Years
		Fish and Shellfish	N/A	830	N/A	0.06						average wood productivity in agroforestry (kg/m2)	1.29				Terrace Fields:	0 years	All years
					Starch %:	1.082						wood caloric value (MJ/kg)	20				Swidden Fields:	6 years	3 years
CROPS											DOMESTIC ANIMALS						WOODLOT (FUEL)		Total Fuel:	85.2		HUNTING				WASTE FOR SETTLEMENT
	Wet Rice		Total Area:	97.0178							PIGS						Fuel wood for cooking						Density of CAR (people/100 km2)	514.879	1903 Census
		kcal from crop per person per yr	260931		Surplus Fraction	0.3						kcal per person per year from pig meat	8154.1										density (people/ha)	0.0514879			Wet Rice
		save for planting next year (fraction)	0.02	Bray	Area for Surplus	22.3887						kg meat needed per person per year	3.44055					Thai per capita energy comsumption (GJ/capita/yr)	8	System cited from:			ha/person	19.422				NPP (g C ha-1 yr-1)	6500000
		waste and loss (fraction)	0.3									Pigs per person	0.344399					Thai per capita energy comsumption (MJ/capita/yr)	8000	Kay and Kaplan 2015			fraction of diet from wild game	0.063				above ground fraction	0.796	Kay and Kaplan 2015
		kcal/ha net	3.97188e+06									kcal for pig per year per person	199571					Thai per capita wood consumption (kg/capita/yr)	400				hunting area (ha)	1390				weed fraction	0.1	Gregg 1988
		area of crop needed per person (ha)	0.0656946									Waste Fraction of Pig Diet	0.9	1				India per capita fuel wood consumption (kg/capita/yr)	551									Above ground biomass (g C ha^-1 yr-1)	10348000	1/.45 converts C to dry matter
		area of crop needed per village (ha)	74.6291									Forage Fraction of Pig Diet	0.1					per capita fuel wood consumption (GJ/capita/yr)	11.02									Harvest Index	0.23
																		average between India and Thai (kg wood/capita/yr)	475.5									Waste per person (g dry matter/yr)	523452
												Area of forest necessary per person (ha)	0.0534117					kg wood necessary for the whole village	540168									Waste for Village (g dry matter/yr)	5.94642e+08
	Swidden		Combined area------->	211.619								total area for pig per person (ha)	0.0534117					m2 of forest for wood production	418735
		Yam (iuktu)										total area for pigs per village (ha)	60.6757					ha of forest for wood production	41.8735								Yams
		kcal from crop per person per yr	301702		Surplus Fraction:							total pigs per village	391.238															NPP (g C m-2 yr-1)	6500000
		save for planting next year (fraction)	0.1		Yam (ubi)	0.1						Total Caloric Need for all Pigs in Settlement	2.26712e+08															above ground fraction	0.6	Default for Root crops (Taro and Yam)
		waste and loss (fraction)	0.3		Taro (gabe)	0											Ceramics											weed fraction	0.1
		kcal/ha net	2850000		Squash (kalabasa)	0												vessels per household per year	30	Kay and Kaplan 2015								Above ground biomass (g C m^-2 yr-1)	7800000
		area of crop needed per person (ha)	0.10586		Sweet Potato (Camote)	0.1												average weight of a vessel (kg)	1.5	Estimate								Harvest Index	0.5	Default, mid-estimate for harvest yield of grains and intensely cultivated plants (0.4-0.6)
		area of crop needed per village (ha)	120.257		Area for Surplus	12.0257					CARABAO							weight of ceramics p.p. (kg yr-1)	45									Waste per person (gC/yr)	412855
												kcal per person per year from carabao meat	815.41					charcoal : ceramics ratio	2	Kay and Kaplan 2015								Waste for Village (gC/yr)	4.69003e+08
		Taro (aba)										kg meat needed per person per year	0.608515					charcoal : wood ratio	4
		kcal from crop per person per yr	17939		Proportion of taro in terraces	1						carabao per person	0.018963					wood needed p. p. for ceramics per year (kg)	360								Taro
		save for planting next year (fraction)	0.1									kcal for carabao per year per person	124576					wood needed p. p. for ceramics per year (GJ)	7.2									NPP (g C m-2 yr-1)	6500000			Raw leaves are poisonous. Cooked, they are consumable
		waste and loss (fraction)	0.3		Terrace taro (ha)	15.2993						pasture grasses fraction of carabao diet	0.6	1	Ratios from Kay and Kaplan 2015			wood for village from ceramics (kg)	408960									above ground fraction	0.59	Hartemink et al 2000
		kcal/ha net	1332000									pasture legumes fraction of carabao diet	0.1					area for woodlot for ceramics (ha)	0	Grasses, twigs only. Maher 1984								weed fraction	0.1
		area of crop needed per person (ha)	0.0134677									straw fraction of carabao diet	0.3															Above ground biomass (g C m^-2 yr-1)	7670000
		area of crop needed per village (ha)	15.2993									area of pasture grasses necessary per person (ha)	0.0735398					All constants cited in Kay and Kaplan 2015										Harvest Index	0.52	Russell and Brown 1998, Hartemink et al 2000
												area of pasture legumes necessary per person (ha)	0.00827366															Waste per person (gC/yr)	49582.8
		Squash (Kalabasa)			Proportion of Squash on Terrace Bunding	1						total area for carabao per person (ha)	0.0818135															Waste for Village (gC/yr)	5.63261e+07
		kcal from crop per person per yr	12231.1									total area for carabao per village (ha)	92.9401				Iron Working
		save for planting next year (fraction)	0									total carabao per village	21.542					Iron per capita per year (kg)	1.5	Kay and Kaplan 2015							Deer Meat
		waste and loss (fraction)	0.3		Terrace Squash (ha)	4.03443												charcoal : iron ratio	82	Sauder and Williams 2002								Fraction of Deer that is Meat	26.7421		Note, Deer waste is a high estimate.
		kcal/ha net	3444000									ALL ANIMALS DISTRIBUTED DURING FEASTS, USE FULL POPULATION!						charcoal : wood ratio	4									Weight of Deer (kg)	68		Includes head, skin, innards, legs. These parts may not have returned to the village.
		area of crop needed per person (ha)	0.00355144															wood needed p. p. for iron (kg yr-1)	492									Waste per Deer (kg)	41.2579		Field dressing would have removed several portions
		area of crop needed per village (ha)	4.03443								GOATS							wood needed p. p. for iron (GJ yr-1)	9.84									Calories per Deer for Humans	23800.5
												kcal per person per year from goat meat	0					wood for village from ironworking (kg)	558912									Calories per Deer for Waste	36719.5
		Sweet Potato (gattuk)										kg meat needed per person per year	0					area for woodlot for iron (ha)	43.3265									Calories from deer per person per year	13046.6
		kcal from crop per person per yr	301702		Area for Surplus	7.2124						goat per person	0															Deer consumed per person per year	0.548164
		save for planting next year (fraction)	0.1									kcal for goat per year per person	0					All constants cited in Kay and Kaplan 2015										Deer consumed for village per year	622.714
		waste and loss (fraction)	0.3									pasture grasses fraction of goat diet	0.65	1														Deer Waste Generated in village per year (kg)	25691.9
		kcal/ha net	4752000									pasture legumes fraction of goat diet	0.1															Deer Waste Generated in village per year (kcal)	2.28658e+07
		area of crop needed per person (ha)	0.0634894									forest browse fraction of goat diet	0.25				MUYONG PRIVATELY OWNED, COMMUNALLY USED FOR FUEL. TOTAL POP. NEEDS DETERMINE TOTAL MUYONG AREA										Mudfish Meat
		area of crop needed per village (ha)	72.124									area of pasture grasses necessary per person (ha)	0															Fraction of Fish that is Meat	0.9	Aggregate of adult fish and fry (which are consumed whole)
												area of pasture legumes necessary per person (ha)	0															Weight of Fish (kg)	0.2	agriculture.com.ph
												area of forest necessary per person (ha)	0															Waste per Mudfish (kg)	0.02
												total area for goat per person (ha)	0															Calories per Fish for Humans	149.4
	Agroforestry		Combined Area	6.04178								total area for goat per village (ha)	0															Calories from fish per person per year	48924.6
	Banana											total goat per village	0															Fish consumed per person per year	327.474
		kcal from crop per person per yr	20385.2																									Fish consumed by village per year	372010	Fish from Payo plus river.
		save for planting next year (fraction)	0																									Fish Waste Generated in village per year (kg)	7440.21
		waste and loss (fraction)	0.3																									Caloric Value of Fish Waste Generated in village each year	8.93569e+06
		kcal/ha net	3.83292e+06
		area of crop needed per person (ha)	0.00531846																								Human Excrement
		area of crop needed per village (ha)	6.04178																									human excrement per day per person (kg)	0.5	Gregg 1988
																												human excrement (kg excrement yr-1)	182.5
																												kcal per kg of human excrement	890
																												kcal from human excrement per person yr-1	162425
																												Human excrement for settlement (kg/yr)	207320
																												kcal from human excrement for whole village per year	184514800

## Sheet: 1800 Goats Present
Ifugao Circle Diagram
Timepoint:	1800
Type:	With Goats
	SUMMARY OF LAND USE
	Item Number	Category	Area (ha)	Tier
	1	Settlement	5.55	1
	2	Terracing (Payo)	112.317	2
	3	Active Swidden Fields (Uma)	120.108	3
	4	Fallow Swidden Fields (Uma)	240.217	4
	5	Pastureland	223.889	4
	6	Agroforestry (Muyong)	6.04178	5
	7	Woodlot (Fuel) (Muyong)	85.2	5
	8	Forest Browse (Pigs)	60.6757	6
	9	Total Hunting Land	1367.93	6
	10	SUM TOTAL INTENSIVE LAND	853.998	N/A
	11	ALL LAND	2221.93	N/A
DIETARY & POPULATION PARAMETERS
Productivity and Calorimetry of Ifugao Foods											Human Parameters						ANIMAL PARAMETERS									Waste Totals
		Crop/Animal	Productivity (kg/ha)	Energy (Cal/kg)	Energy Yield (Cal/ha)	Proportion of Full Diet	Notes					human kcal per day	2234	From Kay and Kaplan 2015				domestic pig weight (kg)	45			ratio of meat per cow from herd : cow weight	0.0736	kay and kaplan 2015, derived from Gregg 1988				kg/yr	Kcal/yr			Pigs in Village:	391.238
	Crops	Wet Rice	1650	3540	5841000	0.32						human kcal per year	815410					Carabao Weight (kg)	436	M&F Ave		ratio of meat per pig from herd: pig weight	0.222	Gregg 1988, p. 122: 40 kg usable meat (which is 30% of live weight) per year / litter size of 6 per year / neolithic pig weight of 30 kg.			Rice Waste	594642	2.85428e+08			Calories per pig per year	579475
		Sweet Potato	6000	1320	7920000	0.21												Goat Weight (kg)	35			ratio of meat per goat from herd: goat weight	0.113	kay and kaplan 2015, derived from Gregg 1988			Yam Waste	266191	1.27772e+08			Calories for all pigs per year	2.26712e+08
		Taro	2000	1110	2220000	0.022																					Taro Waste	56326.1	1.35746e+07
		Purple Yam	5000	950	4750000	0.21																					Deer Waste	25691.9	2.28658e+07
		Banana	5070	1080	5475600	0.025					OKV Settlement Data									productivity	caloric content	energy per area					Fish Waste	7440.21	3.5713e+06			Is Calories from waste greater than calories for pigs?	YES
		Arrowroot	N/A	N/A	N/A	0						Parameter	Value	Source						(kg/ha)	(kcal/kg)	(kcal/ha)	NOTES				Human Waste	207320	184514800			Proportion of Pig Diet made from Waste:	2.81293
		Breadfruit	N/A	N/A	N/A	0						Population	1136					Feeds	pasture grasses	700	1452	1016400	Kay and Kaplan 2015				Total	1.15761e+06	6.37726e+08			If Deer and Fish Excluded?	2.69632
		Squashes	12000	410	4920000	0.015						Households	284	Molano (Scott 1974)					pasture legumes	700	2151	1505700	Kay and Kaplan 2015									If Deer, Fish, and Taro Excluded?	2.63644
		Garden Foods (Settlement/Bunding)	N/A	N/A	N/A	0.035						People per Household	4						forest browse			373646	Kay and Kaplan 2015									If Deer, Fish, Taro, and Rice Excluded?	1.37746
	Domestic Animals	Domestic Pig	N/A	2370	N/A	0.01	Ritual sacrifice,					Estimated Area of Settlement (ha)	5.55	See Section 3.3.1					straw	3408	1122	3823776	Kay and Kaplan 2015
		Chicken	N/A	1730	N/A	0.01	Ritual sacrifice,					Hectares/person in village	0.00488556						Human Excrement	n/a	890	n/a	Gregg 1988
		Dog	N/A	1201	N/A	0.005
		Water Buffalo (Carabao)	N/A	1340	N/A	0.001	Ritual animal,					Sub-Population Name	All People
		Goat	N/A	1480	N/A	0.001						Sub-Population Number of People	1136
		Chicken Eggs	N/A	1600	N/A	0.014																				Plant Waste ME (kcal/kg)	480	CINE, Morong Aetas, Sweet Potato Leaves
	Wild Animals	Wild Pig	N/A	2370	N/A	0.014																				Taro Boiled Leaves (kcal/kg)	241	USDA
		Wild Deer	N/A	890	N/A	0.016					Fuel						FALLOW PERIODS
		Small Terrestrial Game (Reptiles, Birds)	N/A	1201	N/A	0.032	Assume all shellfish and mudfish identical					average wood productivity in agroforestry (t/ha)	12.9	All cited in Kay and Kaplan 2015				Fallow Years	Active Years
		Fish and Shellfish	N/A	830	N/A	0.06						average wood productivity in agroforestry (kg/m2)	1.29				Terrace Fields:	0 years	All years
					Total	1						wood caloric value (MJ/kg)	20				Swidden Fields:	6 years	3 years
CROPS											DOMESTIC ANIMALS						WOODLOT (FUEL)		Total Fuel:	85.2		HUNTING				WASTE FOR SETTLEMENT
	Wet Rice		Total Area:	97.0178							PIGS						Fuel wood for cooking						Density of CAR (people/100 km2)	514.879	1903 Census
		kcal from crop per person per yr	260931		Surplus Fraction	0.3						kcal per person per year from pig meat	8154.1										density (people/ha)	0.0514879			Wet Rice
		save for planting next year (fraction)	0.02	Bray	Area for Surplus	22.3887						kg meat needed per person per year	3.44055					Thai per capita energy comsumption (GJ/capita/yr)	8	System cited from:			ha/person	19.422				NPP (g C ha-1 yr-1)	6500000
		waste and loss (fraction)	0.3									Pigs per person	0.344399					Thai per capita energy comsumption (MJ/capita/yr)	8000	Kay and Kaplan 2015			fraction of diet from wild game	0.062				above ground fraction	0.796	Kay and Kaplan 2015
		kcal/ha net	3.97188e+06									kcal for pig per year per person	199571					Thai per capita wood consumption (kg/capita/yr)	400				hunting area (ha)	1367.93				weed fraction	0.1	Gregg 1988
		area of crop needed per person (ha)	0.0656946									Waste Fraction of Pig Diet	0.9	1				India per capita fuel wood consumption (kg/capita/yr)	551									Above ground biomass (g C ha^-1 yr-1)	10348000	1/.45 converts C to dry matter
		area of crop needed per village (ha)	74.6291									Forage Fraction of Pig Diet	0.1					per capita fuel wood consumption (GJ/capita/yr)	11.02									Harvest Index	0.23
																		average between India and Thai (kg wood/capita/yr)	475.5									Waste per person (g dry matter/yr)	523452
												Area of forest necessary per person (ha)	0.0534117					kg wood necessary for the whole village	540168									Waste for Village (g dry matter/yr)	5.94642e+08
	Swidden		Combined area------->	120.108								total area for pig per person (ha)	0.0534117					m2 of forest for wood production	418735
		Yam (iuktu)										total area for pigs per village (ha)	60.6757					ha of forest for wood production	41.8735								Yams
		kcal from crop per person per yr	171236		Surplus Fraction:							total pigs per village	391.238															NPP (g C m-2 yr-1)	6500000
		save for planting next year (fraction)	0.1		Yam (ubi)	0.1						Total Caloric Need for all Pigs in Settlement	2.26712e+08															above ground fraction	0.6	Default for Root crops (Taro and Yam)
		waste and loss (fraction)	0.3		Taro (gabe)	0											Ceramics											weed fraction	0.1
		kcal/ha net	2850000		Squash (kalabasa)	0												vessels per household per year	30	Kay and Kaplan 2015								Above ground biomass (g C m^-2 yr-1)	7800000
		area of crop needed per person (ha)	0.0600828		Sweet Potato (Camote)	0.1												average weight of a vessel (kg)	1.5	Estimate								Harvest Index	0.5	Default, mid-estimate for harvest yield of grains and intensely cultivated plants (0.4-0.6)
		area of crop needed per village (ha)	68.2541		Area for Surplus	6.82541					CARABAO							weight of ceramics p.p. (kg yr-1)	45									Waste per person (gC/yr)	234323
												kcal per person per year from carabao meat	815.41					charcoal : ceramics ratio	2	Kay and Kaplan 2015								Waste for Village (gC/yr)	2.66191e+08
		Taro (aba)										kg meat needed per person per year	0.608515					charcoal : wood ratio	4
		kcal from crop per person per yr	17939		Proportion of taro in terraces	1						carabao per person	0.018963					wood needed p. p. for ceramics per year (kg)	360								Taro
		save for planting next year (fraction)	0.1									kcal for carabao per year per person	124576					wood needed p. p. for ceramics per year (GJ)	7.2									NPP (g C m-2 yr-1)	6500000			Raw leaves are poisonous. Cooked, they are consumable
		waste and loss (fraction)	0.3		Terrace taro (ha)	15.2993						pasture grasses fraction of carabao diet	0.6	1	Ratios from Kay and Kaplan 2015			wood for village from ceramics (kg)	408960									above ground fraction	0.59	Hartemink et al 2000
		kcal/ha net	1332000									pasture legumes fraction of carabao diet	0.1					area for woodlot for ceramics (ha)	0	Grasses, twigs only. Maher 1984								weed fraction	0.1
		area of crop needed per person (ha)	0.0134677									straw fraction of carabao diet	0.3															Above ground biomass (g C m^-2 yr-1)	7670000
		area of crop needed per village (ha)	15.2993									area of pasture grasses necessary per person (ha)	0.0735398					All constants cited in Kay and Kaplan 2015										Harvest Index	0.52	Russell and Brown 1998, Hartemink et al 2000
												area of pasture legumes necessary per person (ha)	0.00827366															Waste per person (gC/yr)	49582.8
		Squash (Kalabasa)			Proportion of Squash on Terrace Bunding	1						total area for carabao per person (ha)	0.0818135															Waste for Village (gC/yr)	5.63261e+07
		kcal from crop per person per yr	12231.1									total area for carabao per village (ha)	92.9401				Iron Working
		save for planting next year (fraction)	0									total carabao per village	21.542					Iron per capita per year (kg)	1.5	Kay and Kaplan 2015							Deer Meat
		waste and loss (fraction)	0.3		Terrace Squash (ha)	4.03443												charcoal : iron ratio	82	Sauder and Williams 2002								Fraction of Deer that is Meat	26.7421		Note, Deer waste is a high estimate.
		kcal/ha net	3444000									ALL ANIMALS DISTRIBUTED DURING FEASTS, USE FULL POPULATION!						charcoal : wood ratio	4									Weight of Deer (kg)	68		Includes head, skin, innards, legs. These parts may not have returned to the village.
		area of crop needed per person (ha)	0.00355144															wood needed p. p. for iron (kg yr-1)	492									Waste per Deer (kg)	41.2579		Field dressing would have removed several portions
		area of crop needed per village (ha)	4.03443								GOATS							wood needed p. p. for iron (GJ yr-1)	9.84									Calories per Deer for Humans	23800.5
												kcal per person per year from goat meat	815.41					wood for village from ironworking (kg)	558912									Calories per Deer for Waste	36719.5
		Sweet Potato (gattuk)										kg meat needed per person per year	0.550953					area for woodlot for iron (ha)	43.3265									Calories from deer per person per year	13046.6
		kcal from crop per person per yr	171236		Area for Surplus	4.09352						goat per person	0.139305															Deer consumed per person per year	0.548164
		save for planting next year (fraction)	0.1									kcal for goat per year per person	83833.5					All constants cited in Kay and Kaplan 2015										Deer consumed for village per year	622.714
		waste and loss (fraction)	0.3									pasture grasses fraction of goat diet	0.65	1														Deer Waste Generated in village per year (kg)	25691.9
		kcal/ha net	4752000									pasture legumes fraction of goat diet	0.1															Deer Waste Generated in village per year (kcal)	2.28658e+07
		area of crop needed per person (ha)	0.0360345									forest browse fraction of goat diet	0.25				MUYONG PRIVATELY OWNED, COMMUNALLY USED FOR FUEL. TOTAL POP. NEEDS DETERMINE TOTAL MUYONG AREA										Mudfish Meat
		area of crop needed per village (ha)	40.9352									area of pasture grasses necessary per person (ha)	0.0536126															Fraction of Fish that is Meat	0.9	Aggregate of adult fish and fry (which are consumed whole)
												area of pasture legumes necessary per person (ha)	0.00556775															Weight of Fish (kg)	0.2	agriculture.com.ph
												area of forest necessary per person (ha)	0.0560915															Waste per Mudfish (kg)	0.02
												total area for goat per person (ha)	0.115272															Calories per Fish for Humans	149.4
	Agroforestry		Combined Area	6.04178								total area for goat per village (ha)	130.949															Calories from fish per person per year	48924.6
	Banana											total goat per village	158.251															Fish consumed per person per year	327.474
		kcal from crop per person per yr	20385.2																									Fish consumed by village per year	372010	Fish from Payo plus river.
		save for planting next year (fraction)	0																									Fish Waste Generated in village per year (kg)	7440.21
		waste and loss (fraction)	0.3																									Caloric Value of Fish Waste Generated in village each year	8.93569e+06
		kcal/ha net	3.83292e+06
		area of crop needed per person (ha)	0.00531846																								Human Excrement
		area of crop needed per village (ha)	6.04178																									human excrement per day per person (kg)	0.5	Gregg 1988
																												human excrement (kg excrement yr-1)	182.5
																												kcal per kg of human excrement	890
																												kcal from human excrement per person yr-1	162425
																												Human excrement for settlement (kg/yr)	207320
																												kcal from human excrement for whole village per year	184514800

## Sheet: 1800 No Carabao Herd
Ifugao Circle Diagram
Timepoint:	1800
Type:	No Carabao Herd
	SUMMARY OF LAND USE
	Item Number	Category	Area (ha)	Tier
	1	Settlement	5.55	1
	2	Terracing (Payo)	112.317	2
	3	Active Swidden Fields (Uma)	120.108	3
	4	Fallow Swidden Fields (Uma)	240.217	4
	5	Pastureland	0	4
	6	Agroforestry (Muyong)	6.04178	5
	7	Woodlot (Fuel) (Muyong)	85.2	5
	8	Forest Browse (Pigs)	60.6757	6
	9	Total Hunting Land	1390	6
	10	SUM TOTAL INTENSIVE LAND	630.109	N/A
	11	ALL LAND	2020.11	N/A
DIETARY & POPULATION PARAMETERS
Productivity and Calorimetry of Ifugao Foods											Human Parameters						ANIMAL PARAMETERS									Waste Totals
		Crop/Animal	Productivity (kg/ha)	Energy (Cal/kg)	Energy Yield (Cal/ha)	Proportion of Full Diet	Notes					human kcal per day	2234	From Kay and Kaplan 2015				domestic pig weight (kg)	45			ratio of meat per cow from herd : cow weight	0.0736	kay and kaplan 2015, derived from Gregg 1988				kg/yr	Kcal/yr			Pigs in Village:	391.238
	Crops	Wet Rice	1650	3540	5841000	0.32						human kcal per year	815410					Carabao Weight (kg)	436	M&F Ave		ratio of meat per pig from herd: pig weight	0.222	Gregg 1988, p. 122: 40 kg usable meat (which is 30% of live weight) per year / litter size of 6 per year / neolithic pig weight of 30 kg.			Rice Waste	594642	2.85428e+08			Calories per pig per year	579475
		Sweet Potato	6000	1320	7920000	0.21												Goat Weight (kg)	35			ratio of meat per goat from herd: goat weight	0.113	kay and kaplan 2015, derived from Gregg 1988			Yam Waste	266191	1.27772e+08			Calories for all pigs per year	2.26712e+08
		Taro	2000	1110	2220000	0.022																					Taro Waste	56326.1	1.35746e+07
		Purple Yam	5000	950	4750000	0.21																					Deer Waste	25691.9	2.28658e+07
		Banana	5070	1080	5475600	0.025					OKV Settlement Data									productivity	caloric content	energy per area					Fish Waste	7440.21	3.5713e+06			Is Calories from waste greater than calories for pigs?	YES
		Arrowroot	N/A	N/A	N/A	0						Parameter	Value	Source						(kg/ha)	(kcal/kg)	(kcal/ha)	NOTES				Human Waste	207320	184514800			Proportion of Pig Diet made from Waste:	2.81293
		Breadfruit	N/A	N/A	N/A	0						Population	1136					Feeds	pasture grasses	700	1452	1016400	Kay and Kaplan 2015				Total	1.15761e+06	6.37726e+08			If Deer and Fish Excluded?	2.69632
		Squashes	12000	410	4920000	0.015						Households	284	Molano (Scott 1974)					pasture legumes	700	2151	1505700	Kay and Kaplan 2015									If Deer, Fish, and Taro Excluded?	2.63644
		Garden Foods (Settlement/Bunding)	N/A	N/A	N/A	0.035						People per Household	4						forest browse			373646	Kay and Kaplan 2015									If Deer, Fish, Taro, and Rice Excluded?	1.37746
	Domestic Animals	Domestic Pig	N/A	2370	N/A	0.01	Ritual sacrifice,					Estimated Area of Settlement (ha)	5.55	See Section 3.3.1					straw	3408	1122	3823776	Kay and Kaplan 2015
		Chicken	N/A	1730	N/A	0.01	Ritual sacrifice,					Hectares/person in village	0.00488556						Human Excrement	n/a	890	n/a	Gregg 1988
		Dog	N/A	1201	N/A	0.005
		Water Buffalo (Carabao)	N/A	1340	N/A	0.001	All carabao are purchased					Sub-Population Name	All People
		Goat	N/A	1480	N/A	0						Sub-Population Number of People	1136
		Chicken Eggs	N/A	1600	N/A	0.014																				Plant Waste ME (kcal/kg)	480	CINE, Morong Aetas, Sweet Potato Leaves
	Wild Animals	Wild Pig	N/A	2370	N/A	0.015																				Taro Boiled Leaves (kcal/kg)	241	USDA
		Wild Deer	N/A	890	N/A	0.016					Fuel						FALLOW PERIODS
		Small Terrestrial Game (Reptiles, Birds)	N/A	1201	N/A	0.032	Assume all shellfish and mudfish identical					average wood productivity in agroforestry (t/ha)	12.9	All cited in Kay and Kaplan 2015				Fallow Years	Active Years
		Fish and Shellfish	N/A	830	N/A	0.06						average wood productivity in agroforestry (kg/m2)	1.29				Terrace Fields:	0 years	All years
					Starch %:	0.762						wood caloric value (MJ/kg)	20				Swidden Fields:	6 years	3 years
CROPS											DOMESTIC ANIMALS						WOODLOT (FUEL)		Total Fuel:	85.2		HUNTING				WASTE FOR SETTLEMENT
	Wet Rice		Total Area:	97.0178							PIGS						Fuel wood for cooking						Density of CAR (people/100 km2)	514.879	1903 Census
		kcal from crop per person per yr	260931		Surplus Fraction	0.3						kcal per person per year from pig meat	8154.1										density (people/ha)	0.0514879			Wet Rice
		save for planting next year (fraction)	0.02	Bray	Area for Surplus	22.3887						kg meat needed per person per year	3.44055					Thai per capita energy comsumption (GJ/capita/yr)	8	System cited from:			ha/person	19.422				NPP (g C ha-1 yr-1)	6500000
		waste and loss (fraction)	0.3									Pigs per person	0.344399					Thai per capita energy comsumption (MJ/capita/yr)	8000	Kay and Kaplan 2015			fraction of diet from wild game	0.063				above ground fraction	0.796	Kay and Kaplan 2015
		kcal/ha net	3.97188e+06									kcal for pig per year per person	199571					Thai per capita wood consumption (kg/capita/yr)	400				hunting area (ha)	1390				weed fraction	0.1	Gregg 1988
		area of crop needed per person (ha)	0.0656946									Waste Fraction of Pig Diet	0.9	1				India per capita fuel wood consumption (kg/capita/yr)	551									Above ground biomass (g C ha^-1 yr-1)	10348000	1/.45 converts C to dry matter
		area of crop needed per village (ha)	74.6291									Forage Fraction of Pig Diet	0.1					per capita fuel wood consumption (GJ/capita/yr)	11.02									Harvest Index	0.23
																		average between India and Thai (kg wood/capita/yr)	475.5									Waste per person (g dry matter/yr)	523452
												Area of forest necessary per person (ha)	0.0534117					kg wood necessary for the whole village	540168									Waste for Village (g dry matter/yr)	5.94642e+08
	Swidden		Combined area------->	120.108								total area for pig per person (ha)	0.0534117					m2 of forest for wood production	418735
		Yam (iuktu)										total area for pigs per village (ha)	60.6757					ha of forest for wood production	41.8735								Yams
		kcal from crop per person per yr	171236		Surplus Fraction:							total pigs per village	391.238															NPP (g C m-2 yr-1)	6500000
		save for planting next year (fraction)	0.1		Yam (ubi)	0.1						Total Caloric Need for all Pigs in Settlement	2.26712e+08															above ground fraction	0.6	Default for Root crops (Taro and Yam)
		waste and loss (fraction)	0.3		Taro (gabe)	0											Ceramics											weed fraction	0.1
		kcal/ha net	2850000		Squash (kalabasa)	0												vessels per household per year	30	Kay and Kaplan 2015								Above ground biomass (g C m^-2 yr-1)	7800000
		area of crop needed per person (ha)	0.0600828		Sweet Potato (Camote)	0.1												average weight of a vessel (kg)	1.5	Estimate								Harvest Index	0.5	Default, mid-estimate for harvest yield of grains and intensely cultivated plants (0.4-0.6)
		area of crop needed per village (ha)	68.2541		Area for Surplus	6.82541					CARABAO							weight of ceramics p.p. (kg yr-1)	45									Waste per person (gC/yr)	234323
												kcal per person per year from carabao meat	815.41	All carabao Purchased				charcoal : ceramics ratio	2	Kay and Kaplan 2015								Waste for Village (gC/yr)	2.66191e+08
		Taro (aba)										kg meat needed per person per year	0.608515					charcoal : wood ratio	4
		kcal from crop per person per yr	17939		Proportion of taro in terraces	1						carabao per person	0.018963					wood needed p. p. for ceramics per year (kg)	360								Taro
		save for planting next year (fraction)	0.1									kcal for carabao per year per person	124576					wood needed p. p. for ceramics per year (GJ)	7.2									NPP (g C m-2 yr-1)	6500000			Raw leaves are poisonous. Cooked, they are consumable
		waste and loss (fraction)	0.3		Terrace taro (ha)	15.2993						pasture grasses fraction of carabao diet	0	0	Ratios from Kay and Kaplan 2015			wood for village from ceramics (kg)	408960									above ground fraction	0.59	Hartemink et al 2000
		kcal/ha net	1332000									pasture legumes fraction of carabao diet	0					area for woodlot for ceramics (ha)	0	Grasses, twigs only. Maher 1984								weed fraction	0.1
		area of crop needed per person (ha)	0.0134677									straw fraction of carabao diet	0															Above ground biomass (g C m^-2 yr-1)	7670000
		area of crop needed per village (ha)	15.2993									area of pasture grasses necessary per person (ha)	0					All constants cited in Kay and Kaplan 2015										Harvest Index	0.52	Russell and Brown 1998, Hartemink et al 2000
												area of pasture legumes necessary per person (ha)	0															Waste per person (gC/yr)	49582.8
		Squash (Kalabasa)			Proportion of Squash on Terrace Bunding	1						total area for carabao per person (ha)	0															Waste for Village (gC/yr)	5.63261e+07
		kcal from crop per person per yr	12231.1									total area for carabao per village (ha)	0				Iron Working
		save for planting next year (fraction)	0									total carabao per village	21.542					Iron per capita per year (kg)	1.5	Kay and Kaplan 2015							Deer Meat
		waste and loss (fraction)	0.3		Terrace Squash (ha)	4.03443												charcoal : iron ratio	82	Sauder and Williams 2002								Fraction of Deer that is Meat	26.7421		Note, Deer waste is a high estimate.
		kcal/ha net	3444000									ALL ANIMALS DISTRIBUTED DURING FEASTS, USE FULL POPULATION!						charcoal : wood ratio	4									Weight of Deer (kg)	68		Includes head, skin, innards, legs. These parts may not have returned to the village.
		area of crop needed per person (ha)	0.00355144															wood needed p. p. for iron (kg yr-1)	492									Waste per Deer (kg)	41.2579		Field dressing would have removed several portions
		area of crop needed per village (ha)	4.03443								GOATS							wood needed p. p. for iron (GJ yr-1)	9.84									Calories per Deer for Humans	23800.5
												kcal per person per year from goat meat	0					wood for village from ironworking (kg)	558912									Calories per Deer for Waste	36719.5
		Sweet Potato (gattuk)										kg meat needed per person per year	0					area for woodlot for iron (ha)	43.3265									Calories from deer per person per year	13046.6
		kcal from crop per person per yr	171236		Area for Surplus	4.09352						goat per person	0															Deer consumed per person per year	0.548164
		save for planting next year (fraction)	0.1									kcal for goat per year per person	0					All constants cited in Kay and Kaplan 2015										Deer consumed for village per year	622.714
		waste and loss (fraction)	0.3									pasture grasses fraction of goat diet	0.65	1														Deer Waste Generated in village per year (kg)	25691.9
		kcal/ha net	4752000									pasture legumes fraction of goat diet	0.1															Deer Waste Generated in village per year (kcal)	2.28658e+07
		area of crop needed per person (ha)	0.0360345									forest browse fraction of goat diet	0.25				MUYONG PRIVATELY OWNED, COMMUNALLY USED FOR FUEL. TOTAL POP. NEEDS DETERMINE TOTAL MUYONG AREA										Mudfish Meat
		area of crop needed per village (ha)	40.9352									area of pasture grasses necessary per person (ha)	0															Fraction of Fish that is Meat	0.9	Aggregate of adult fish and fry (which are consumed whole)
												area of pasture legumes necessary per person (ha)	0															Weight of Fish (kg)	0.2	agriculture.com.ph
												area of forest necessary per person (ha)	0															Waste per Mudfish (kg)	0.02
												total area for goat per person (ha)	0															Calories per Fish for Humans	149.4
	Agroforestry		Combined Area	6.04178								total area for goat per village (ha)	0															Calories from fish per person per year	48924.6
	Banana											total goat per village	0															Fish consumed per person per year	327.474
		kcal from crop per person per yr	20385.2																									Fish consumed by village per year	372010	Fish from Payo plus river.
		save for planting next year (fraction)	0																									Fish Waste Generated in village per year (kg)	7440.21
		waste and loss (fraction)	0.3																									Caloric Value of Fish Waste Generated in village each year	8.93569e+06
		kcal/ha net	3.83292e+06
		area of crop needed per person (ha)	0.00531846																								Human Excrement
		area of crop needed per village (ha)	6.04178																									human excrement per day per person (kg)	0.5	Gregg 1988
																												human excrement (kg excrement yr-1)	182.5
																												kcal per kg of human excrement	890
																												kcal from human excrement per person yr-1	162425
																												Human excrement for settlement (kg/yr)	207320
																												kcal from human excrement for whole village per year	184514800

[truncated: 3 more sheets: 1800 Kadangyan, 1800 Nawotwot, Alternative Hunting 1800]
